# Supplementary material for: AACR Project GENIE: Powering Precision Medicine through an International Consortium
Source: Oxford University Press journal article supplement (doi:10.1158/2159-8290.cd-17-0151), 2017-06-01
Supplement: 21598290cd170151-sup-178736_2_supp_4021823_kphxrk.xlsx [file 21598290cd170151-sup-178736_2_supp_4021823_kphxrk.xlsx]

## Sheet: Non-Small Cell Lung Cancer
	MSK	VICC	DFCI	GRCC	JHU	UHN	NKI
TP53	0.543877	0.576923	0.487421	0.383333	0.430843	0.428571	0.53271
KRAS	0.256509	0.24359	0.292453	0.183333	0.302067	0.253968	0.233645
EGFR	0.267117	0.282051	0.171908	0.1	0.168521	0.18254	0.149533
CDKN2A	0.14947	0.179487	0.109015	0.05	0.0540541	0.0634921	0
STK11	0.165863	0.128205	0.142558	0.0333333	0.073132	0.031746	0.0280374
PIK3CA	0.0819672	0.153846	0.0660377	0.0333333	0.0524642	0.031746	0.0373832
ATM	0.0675024	0.102564	0.122642	0.0166667	0.036566	0.047619	0
BRAF	0.0626808	0.025641	0.0545073	0.0666667	0.0524642	0.0555556	0.0186916
MET	0.0665381	0.0641026	0.0639413	0.0333333	0.0333863	0.0238095	0.0280374
APC	0.0501446	0.102564	0.0681342	0.0333333	0.0302067	0.0238095	0
RB1	0.0636451	0.0897436	0.0639413	0.0166667	0.0286169	0.031746	0
KDR	0.0366442	0.0897436	0.048218	0.05	0.0286169	0.0238095	0.00934579
ERBB2	0.0491803	0.0897436	0.0471698	0.0166667	0.00794913	0.0555556	0
ERBB4	0.0491803	0.0512821	0.0702306	0.0166667	0.0206677	0.0238095	0.0186916
PTEN	0.045323	0.0769231	0.0419287	0	0.0238474	0.031746	0.00934579
ALK	0.072324	0.0769231	0.067086	0	0	0.00793651	0
GNAS	0.0260366	0.115385	0.0597484	0	0.00476948	0.015873	0
NOTCH1	0.0279653	0.102564	0.0607966	0	0.00158983	0	0
PDGFRA	0.0356798	0.0512821	0.067086	0	0.0206677	0.015873	0
SMAD4	0.0376085	0.0512821	0.0429769	0	0.0286169	0.00793651	0.0186916
JAK3	0.0289296	0.102564	0.0324948	0	0	0.015873	0
FGFR3	0.0202507	0.0641026	0.0262055	0	0.0206677	0.031746	0
FGFR1	0.0327869	0.0641026	0.0303983	0.0166667	0.00476948	0.00793651	0
CTNNB1	0.0337512	0.0384615	0.0272537	0	0.0206677	0.031746	0
RET	0.0366442	0.0512821	0.0471698	0	0.00794913	0.00793651	0
FBXW7	0.0318226	0.025641	0.0272537	0	0.0206677	0.015873	0.0280374
JAK2	0.0308582	0.0512821	0.033543	0	0	0.00793651	0.00934579
KIT	0.0202507	0.025641	0.0178197	0.0166667	0.0206677	0.015873	0
FLT3	0.0192864	0.0384615	0.0387841	0	0.00317965	0.015873	0
SMO	0.0154291	0.025641	0.0230608	0	0.0063593	0.031746	0.00934579
CDH1	0.0135005	0.0384615	0.0262055	0	0.00794913	0.015873	0.00934579
GNA11	0.00675024	0.0128205	0.00524109	0	0	0.0714286	0
ABL1	0.0125362	0.0384615	0.0188679	0	0.0111288	0.00793651	0
MPL	0.0106075	0.0512821	0.0199161	0	0.00476948	0	0
NRAS	0.0125362	0	0.0146751	0	0.0158983	0.015873	0.0186916
SMARCB1	0.00867888	0	0.00838574	0.0333333	0.00794913	0.00793651	0
PTPN11	0.0115718	0.0128205	0.00943396	0	0.0158983	0.015873	0
CSF1R	0.0173578	0	0.035124	0	0.00476948	0.00793651	0
FGFR2	0.00771456	0.0128205	0.0167715	0	0.00794913	0.00793651	0.00934579
IDH1	0.00771456	0.0128205	0.00838574	0	0.00794913	0.00793651	0.00934579
VHL	0.00289296	0.025641	0.00209644	0	0.00317965	0.015873	0
GNAQ	0.00675024	0	0.00419287	0	0.00158983	0.00793651	0.0280374
HNF1A	0.0106075	0	0.0220126	0	0.0111288	0	0
HRAS	0.00192864	0.0128205	0.00838574	0	0.00317965	0.015873	0
MLH1	0.00675024	0.0128205	0.0157233	0	0.00158983	0	0
SRC	0.00867888	0.0128205	0.00838574	0	0	0	0
AKT1	0.0106075	0	0.0136268	0	0.00317965	0	0
NPM1	0.00867888	0	0.00209644	0	0	0	0
EZH2	0.0115718	0	0.0167715	0	0	NA	NA
IDH2	0.00385728	0	0.00628931	0	0.00158983	NA	NA
KEAP1	0.14947	0.141026	0.161157	0.0961538	NA	NA	NA
BRCA2	0.0356798	0.102564	0.067086	0.0576923	NA	NA	NA
NF1	0.0703954	0.0897436	0.0974843	0	NA	NA	NA
FLT1	0.0327869	0.0512821	0.0733753	0.0192308	NA	NA	NA
TSC2	0.0202507	0.0897436	0.0607966	0	NA	NA	NA
MTOR	0.0337512	0.025641	0.0534591	0.0576923	NA	NA	NA
DDR2	0.0260366	0.0641026	0.024109	0.0384615	NA	NA	NA
BRCA1	0.0250723	0.0512821	0.0587002	0	NA	NA	NA
ROS1	0.0501446	0.025641	0.0513627	0	NA	NA	NA
NFE2L2	0.0327869	0.0384615	0.033543	0.0192308	NA	NA	NA
ERBB3	0.0106075	0.025641	0.0272537	0.0576923	NA	NA	NA
NOTCH2	0.021215	0.025641	0.0492662	0.0192308	NA	NA	NA
MAP3K1	0.0221794	0.025641	0.024109	0	NA	NA	NA
AKT3	0.0173578	0.0384615	0.0136268	0	NA	NA	NA
TSC1	0.0154291	0.0128205	0.0324948	0	NA	NA	NA
AKT2	0.0183221	0.025641	0.0146751	0	NA	NA	NA
FGFR4	0.0192864	0.0128205	0.0188679	0	NA	NA	NA
PIK3R1	0.0173578	0.0128205	0.0125786	0	NA	NA	NA
MAP2K4	0.00771456	0.0128205	0.0136268	0	NA	NA	NA
MAP2K1	0.0125362	0.0128205	0.00733753	0	NA	NA	NA
KMT2D	0.072324	0.141026	0.138365	NA	NA	NA	NA
ARID1A	0.0838959	0.128205	0.091195	NA	NA	NA	NA
SMARCA4	0.0916104	0.128205	0.0807128	NA	NA	NA	NA
EPHA3	0.0675024	0.102564	0.0953878	NA	NA	NA	NA
PTPRD	0.0945034	0	0.169421	NA	NA	NA	NA
ARID1B	0.0260366	0.159091	0.0754717	NA	NA	NA	NA
EPHA5	0.0549662	0.0897436	0.0943396	NA	NA	NA	NA
NKX2-1	0.0713597	0.115385	0.0408805	NA	NA	NA	NA
MYC	0.0636451	0.128205	0.0283019	NA	NA	NA	NA
KMT2C	0.0588235	0.136364	NA	0	NA	NA	NA
NTRK3	0.051109	0.0641026	0.0796646	NA	NA	NA	NA
NTRK1	0.0308582	0.102564	0.0513627	NA	NA	NA	NA
ATRX	0.0530376	0.0641026	0.0649895	NA	NA	NA	NA
CDKN2B	0.0790743	0.0384615	0.0513627	NA	NA	NA	NA
SETD2	0.0549662	0.0384615	0.0702306	NA	NA	NA	NA
MDM2	0.0636451	0.0512821	0.0440252	NA	NA	NA	NA
GLI1	0.0431433	0.0681818	0.0440252	NA	NA	NA	NA
ARID2	0.048216	0.025641	0.0796646	NA	NA	NA	NA
KDM5C	0.0308582	0.0769231	0.0433884	NA	NA	NA	NA
EPHA7	0.0400616	0.0681818	0.0408805	NA	NA	NA	NA
BCOR	0.0366442	0.0769231	0.033543	NA	NA	NA	NA
FLT4	0.0347155	0.0641026	0.0471698	NA	NA	NA	NA
INPP4B	0.0289296	0.0909091	NA	0.0192308	NA	NA	NA
CREBBP	0.0530376	0.025641	0.0597484	NA	NA	NA	NA
CARD11	0.0385728	0.0641026	0.0356394	NA	NA	NA	NA
AR	0.0356798	0.0769231	0.024109	NA	NA	NA	NA
IKZF1	0.0347155	0.0641026	0.0377358	NA	NA	NA	NA
TERT	0.0568949	0.0227273	0.0534591	NA	NA	NA	NA
KMT2A	0.021215	0.0641026	0.0440252	NA	NA	NA	NA
FANCA	0.0221794	0.0641026	0.0398323	NA	NA	NA	NA
CCND1	0.0289296	0.0769231	0.0178197	NA	NA	NA	NA
SOX2	0.0289296	0.0769231	0.0167715	NA	NA	NA	NA
BRIP1	0.021215	0.0769231	0.024109	NA	NA	NA	NA
SDHA	0.0414658	0.0454545	0.035124	NA	NA	NA	NA
MCL1	0.0405014	0.0641026	0.0146751	NA	NA	NA	NA
DNMT3A	0.0183221	0.0512821	0.0440252	NA	NA	NA	NA
MYCN	0.0106075	0.0897436	0.0125786	NA	NA	NA	NA
PDGFRB	0.0163934	0.0641026	0.0293501	NA	NA	NA	NA
TET2	0.0202507	0.025641	0.0639413	NA	NA	NA	NA
NFKBIA	0.03698	0.0512821	0.0199161	NA	NA	NA	NA
KDM6A	0.021215	0.0512821	0.0293501	NA	NA	NA	NA
CDK4	0.0414658	0.025641	0.0314465	NA	NA	NA	NA
ASXL1	0.0192864	0.0384615	0.0377358	NA	NA	NA	NA
PTCH1	0.0154291	0.0384615	0.0408805	NA	NA	NA	NA
EP300	0.021215	0.025641	0.0408805	NA	NA	NA	NA
PBRM1	0.0289296	0.025641	0.0330579	NA	NA	NA	NA
BCL6	0.0163934	0.0512821	0.0188679	NA	NA	NA	NA
AXL	0.0144648	0.0512821	0.0178197	NA	NA	NA	NA
MDM4	0.0154291	0.0512821	0.0167715	NA	NA	NA	NA
IGF1R	0.0192864	0.025641	0.0356394	NA	NA	NA	NA
CCNE1	0.0250723	0.0384615	0.0167715	NA	NA	NA	NA
STAG2	0.0308582	0.0128205	0.0324948	NA	NA	NA	NA
BLM	0.00771456	0.025641	0.0419287	NA	NA	NA	NA
BRD4	0.0096432	0.0454545	0.0199161	NA	NA	NA	NA
CEBPA	0.0200308	0.0384615	0.0146751	NA	NA	NA	NA
PPP2R1A	0.0154291	0.0384615	NA	0.0192308	NA	NA	NA
MSH6	0.00771456	0.0384615	0.0262055	NA	NA	NA	NA
GATA3	0.021215	0.025641	0.0251572	NA	NA	NA	NA
NOTCH4	0.0327869	0	NA	0.0384615	NA	NA	NA
PMS2	0.0183221	0.025641	0.0251572	NA	NA	NA	NA
CDC73	0.0115718	0.0384615	0.0188679	NA	NA	NA	NA
FH	0.0115718	0.0454545	0.0104822	NA	NA	NA	NA
ESR1	0.0163934	0.025641	0.0251572	NA	NA	NA	NA
WT1	0.0135005	0.025641	0.0251572	NA	NA	NA	NA
ETV1	0.0279653	0.0128205	0.0230608	NA	NA	NA	NA
CCND3	0.00675024	0.0512821	0.00524109	NA	NA	NA	NA
SDHC	0.0096432	0.0454545	0.00733753	NA	NA	NA	NA
CRKL	0.00867888	0.0512821	0.00209644	NA	NA	NA	NA
NTRK2	0.0154291	0.025641	0.0199161	NA	NA	NA	NA
DICER1	0.0202507	0	0.0398323	NA	NA	NA	NA
MITF	0.0048216	0.0384615	0.0136268	NA	NA	NA	NA
NF2	0.0125362	0.025641	0.0178197	NA	NA	NA	NA
DIS3	0.0144648	0	0.0387841	NA	NA	NA	NA
CHEK2	0.00867888	0.025641	0.0188679	NA	NA	NA	NA
CBL	0.0115718	0.0128205	0.0283019	NA	NA	NA	NA
CDK6	0.00675024	0.0384615	0.00733753	NA	NA	NA	NA
SOX9	0.0135005	0.0227273	0.0146751	NA	NA	NA	NA
RUNX1	0.0125362	0.025641	0.0125786	NA	NA	NA	NA
RARA	0.00771456	0.025641	0.0167715	NA	NA	NA	NA
BAP1	0.0202507	0.0128205	0.0157233	NA	NA	NA	NA
ERCC2	0.0192864	0	0.0272537	NA	NA	NA	NA
SF3B1	0.0192864	0	0.0262055	NA	NA	NA	NA
TNFAIP3	0.00675024	0.025641	0.0125786	NA	NA	NA	NA
MSH2	0.0163934	0.0128205	0.0157233	NA	NA	NA	NA
PALB2	0.0183221	0	0.0262055	NA	NA	NA	NA
PAX5	0.0154291	0.0128205	0.0125786	NA	NA	NA	NA
STAT3	0.00616333	0.0227273	0.0115304	NA	NA	NA	NA
NBN	0.0192864	0	0.0209644	NA	NA	NA	NA
ERCC4	0.0106075	0	0.0272537	NA	NA	NA	NA
MUTYH	0.0135005	0.0128205	0.0115304	NA	NA	NA	NA
FLCN	0.00578592	0.0227273	0.00838574	NA	NA	NA	NA
MEN1	0.0192864	0	0.0157233	NA	NA	NA	NA
CDKN1A	0.00578592	0.0227273	0.00628931	NA	NA	NA	NA
CD79B	0.0048216	0.025641	0.00419287	NA	NA	NA	NA
ARAF	0.021215	0	0.0125786	NA	NA	NA	NA
PARK2	0.0135005	0	0.0199161	NA	NA	NA	NA
XPO1	0.0115718	0.0128205	0.00733753	NA	NA	NA	NA
FANCC	0.00675024	0.0128205	0.0115304	NA	NA	NA	NA
H3F3A	0.00308166	0.0227273	0.00524109	NA	NA	NA	NA
PRKAR1A	0.00578592	0.0128205	0.0115304	NA	NA	NA	NA
AURKA	0.00867888	0.0128205	0.00838574	NA	NA	NA	NA
U2AF1	0.0221794	0	0.00628931	NA	NA	NA	NA
ETV6	0.0202507	0	0.00733753	NA	NA	NA	NA
CRLF2	0.0250723	0	0.00104822	NA	NA	NA	NA
CDKN1B	0.0202507	0	0.00524109	NA	NA	NA	NA
SMAD2	0.0115718	0	0.0136268	NA	NA	NA	NA
LMO1	0.00385728	0.0128205	0.00838574	NA	NA	NA	NA
PRDM1	0.0135005	0	0.0115304	NA	NA	NA	NA
MYD88	0.00385728	0.0128205	0.00524109	NA	NA	NA	NA
CCND2	0.0135005	0	0.00838574	NA	NA	NA	NA
ALOX12B	0.0048216	0	0.0157233	NA	NA	NA	NA
REL	0.0096432	0	0.0104822	NA	NA	NA	NA
MYCL	0.00867888	0	0.0104822	NA	NA	NA	NA
RAF1	0.0125362	0	0.00628931	NA	NA	NA	NA
SUFU	0.00578592	0	0.0125786	NA	NA	NA	NA
BMPR1A	0.00867888	0	0.00943396	NA	NA	NA	NA
SYK	0.00385728	0	0.0136268	NA	NA	NA	NA
SH2B3	0.00308166	0	0.0136268	NA	NA	NA	NA
PNRC1	0.00675024	0	0.00838574	NA	NA	NA	NA
SOCS1	0.00867888	0	0.00628931	NA	NA	NA	NA
CD274	0.00675024	0	0.00733753	NA	NA	NA	NA
FAM46C	0.00771456	0	0.00628931	NA	NA	NA	NA
AURKB	0.00192864	0	0.0115304	NA	NA	NA	NA
MEF2B	0.0048216	0	0.00838574	NA	NA	NA	NA
SDHD	0.00096432	0	0.0115304	NA	NA	NA	NA
SDHB	0.00578592	0	0.00628931	NA	NA	NA	NA
CDKN2C	0.00385728	0	0.00733753	NA	NA	NA	NA
EWSR1	0.00154083	0	0.00943396	NA	NA	NA	NA
BCL2	0.00385728	0	0.00628931	NA	NA	NA	NA
BCL2L1	0.00578592	0	0.00209644	NA	NA	NA	NA
PRKDC	NA	0.0897436	0.109015	NA	NA	NA	NA
RBM10	0.0838959	0.113636	NA	NA	NA	NA	NA
FAT1	0.0858245	0.0909091	NA	NA	NA	NA	NA
ATR	0.0424301	0.115385	NA	NA	NA	NA	NA
PIK3CG	0.0462874	0.102564	NA	NA	NA	NA	NA
INHBA	0.0292758	0.115385	NA	NA	NA	NA	NA
EPHB1	0.0385728	0.102564	NA	NA	NA	NA	NA
MED12	0.0491803	0.0897436	NA	NA	NA	NA	NA
PIK3C2B	NA	0.0909091	0.0408805	NA	NA	NA	NA
HGF	0.048216	0.0769231	NA	NA	NA	NA	NA
PRKCI	NA	0.0909091	0.0230608	NA	NA	NA	NA
BCORL1	NA	0.0512821	0.0524109	NA	NA	NA	NA
IRF4	0.0135005	0.0897436	NA	NA	NA	NA	NA
TBX3	0.0385728	0.0641026	NA	NA	NA	NA	NA
GATA6	NA	0.0681818	0.024109	NA	NA	NA	NA
RECQL4	0.0405014	NA	0.0413223	NA	NA	NA	NA
ZNF217	NA	0.0512821	0.0303983	NA	NA	NA	NA
RICTOR	0.0298939	0.0512821	NA	NA	NA	NA	NA
PIK3CB	0.0106075	0.0681818	NA	NA	NA	NA	NA
CDK12	0.0260366	0.0512821	NA	NA	NA	NA	NA
EML4	0.0260366	0.0512821	NA	NA	NA	NA	NA
POLE	0.0318226	0.0454545	NA	NA	NA	NA	NA
GRIN2A	0.0376085	0.0384615	NA	NA	NA	NA	NA
FGF19	0.0231437	0.0512821	NA	NA	NA	NA	NA
FGF4	0.0221794	0.0512821	NA	NA	NA	NA	NA
IRS2	0.0221794	0.0512821	NA	NA	NA	NA	NA
TERC	NA	0.0681818	0.00413223	NA	NA	NA	NA
AMER1	0.0318226	0.0384615	NA	NA	NA	NA	NA
NOTCH3	0.0318226	0.0384615	NA	NA	NA	NA	NA
TSHR	0.0173578	0.0512821	NA	NA	NA	NA	NA
SPEN	0.0289296	0.0384615	NA	NA	NA	NA	NA
RNF43	0.0144648	0.0512821	NA	NA	NA	NA	NA
FGF3	0.0260366	0.0384615	NA	NA	NA	NA	NA
ERG	0.0115718	0.0512821	NA	NA	NA	NA	NA
DOT1L	0.0221794	0.0384615	NA	NA	NA	NA	NA
CTCF	0.00867888	0.0512821	NA	NA	NA	NA	NA
DAXX	0.00771456	0.0512821	NA	NA	NA	NA	NA
CHEK1	0.0048216	0.0512821	NA	NA	NA	NA	NA
KDM5A	0.0289296	0.025641	NA	NA	NA	NA	NA
RPTOR	0.0154291	0.0384615	NA	NA	NA	NA	NA
JAK1	0.0154291	0.0384615	NA	NA	NA	NA	NA
NSD1	0.027001	0.025641	NA	NA	NA	NA	NA
IKBKE	0.0135005	0.0384615	NA	NA	NA	NA	NA
CIC	0.0260366	0.025641	NA	NA	NA	NA	NA
IL7R	0.0250723	0.025641	NA	NA	NA	NA	NA
FANCD2	NA	0.025641	0.024109	NA	NA	NA	NA
ERCC5	0.021215	NA	0.0283019	NA	NA	NA	NA
NEGR1	0.0215716	NA	0.0268595	NA	NA	NA	NA
FANCE	NA	0.0384615	0.00838574	NA	NA	NA	NA
FANCF	NA	0.0384615	0.00838574	NA	NA	NA	NA
CYLD	NA	0.0227273	0.024109	NA	NA	NA	NA
RAD50	0.0192864	0.025641	NA	NA	NA	NA	NA
RFWD2	0.0202507	NA	0.0220126	NA	NA	NA	NA
TCF3	0.0154083	NA	0.0251572	NA	NA	NA	NA
GATA1	0.0144648	0.025641	NA	NA	NA	NA	NA
AXIN1	0.0163934	0.0227273	NA	NA	NA	NA	NA
FOXP1	0.0163934	0.0227273	NA	NA	NA	NA	NA
KIF5B	0.0096432	0.0294118	NA	NA	NA	NA	NA
MRE11A	0.0144648	0.0227273	NA	NA	NA	NA	NA
PIK3C2G	0.0366442	0	NA	NA	NA	NA	NA
RAC1	0.0115718	0.0227273	NA	NA	NA	NA	NA
PMS1	0.0154291	NA	0.0188679	NA	NA	NA	NA
FANCG	NA	0.025641	0.00838574	NA	NA	NA	NA
FAS	NA	0.0227273	0.0104822	NA	NA	NA	NA
RP4-806M20.3	NA	0.0227273	0.0104822	NA	NA	NA	NA
RAD21	0.0123267	NA	0.0199161	NA	NA	NA	NA
PLCG2	0.00924499	0.0227273	NA	NA	NA	NA	NA
TPM3	0.00154083	0.0294118	NA	NA	NA	NA	NA
ERCC3	0.00675024	NA	0.024109	NA	NA	NA	NA
JUN	0.0048216	0.025641	NA	NA	NA	NA	NA
CD79A	0.0046225	0.025641	NA	NA	NA	NA	NA
TNFRSF14	0.00289296	0.025641	NA	NA	NA	NA	NA
CSF3R	0.00770416	NA	0.0206612	NA	NA	NA	NA
NUP93	0.0154083	0.0128205	NA	NA	NA	NA	NA
NCOR1	0.0279653	0	NA	NA	NA	NA	NA
SMAD3	0.0048216	0.0227273	NA	NA	NA	NA	NA
SUZ12	0.00771456	NA	0.0188679	NA	NA	NA	NA
GATA2	0.0135005	0.0128205	NA	NA	NA	NA	NA
TACC3	0.00289296	0.0227273	NA	NA	NA	NA	NA
FOXL2	0.0125362	0.0128205	NA	NA	NA	NA	NA
MAP3K13	0.0250723	0	NA	NA	NA	NA	NA
MST1R	0.0246533	0	NA	NA	NA	NA	NA
GSK3B	0.0096432	0.0128205	NA	NA	NA	NA	NA
PIK3C3	0.0221794	0	NA	NA	NA	NA	NA
VEGFA	0.00924499	0.0128205	NA	NA	NA	NA	NA
B2M	0.0125362	NA	0.00943396	NA	NA	NA	NA
TCF7L2	0.00924499	NA	0.0125786	NA	NA	NA	NA
ETV5	NA	0	0.0209644	NA	NA	NA	NA
CDK8	0.00771456	0.0128205	NA	NA	NA	NA	NA
POLD1	0.01849	0	NA	NA	NA	NA	NA
TGFBR2	0.0183221	0	NA	NA	NA	NA	NA
MAP2K2	0.0048216	0.0128205	NA	NA	NA	NA	NA
CUL3	0.0173578	0	NA	NA	NA	NA	NA
INSR	0.0173578	0	NA	NA	NA	NA	NA
BARD1	0.0173578	0	NA	NA	NA	NA	NA
PHOX2B	0.00771456	NA	0.00943396	NA	NA	NA	NA
SPOP	0.00385728	0.0128205	NA	NA	NA	NA	NA
SRSF2	0.00770416	NA	0.00838574	NA	NA	NA	NA
GATA4	NA	0	0.0157233	NA	NA	NA	NA
IGF2	0.0144648	0	NA	NA	NA	NA	NA
PARP1	0.0144648	0	NA	NA	NA	NA	NA
RAD52	0.0144648	0	NA	NA	NA	NA	NA
BTK	0.0135005	0	NA	NA	NA	NA	NA
MAPK1	0.00675024	NA	0.00628931	NA	NA	NA	NA
EED	0.00675024	NA	0.00619835	NA	NA	NA	NA
ETV4	NA	0	0.0125786	NA	NA	NA	NA
CASP8	0.0125362	0	NA	NA	NA	NA	NA
IGF1	0.0125362	0	NA	NA	NA	NA	NA
MYB	NA	0	0.0115304	NA	NA	NA	NA
ZRSR2	0.00308166	NA	0.00838574	NA	NA	NA	NA
FUBP1	0.0106075	0	NA	NA	NA	NA	NA
PIK3R2	0.0106075	0	NA	NA	NA	NA	NA
RHEB	0.00770416	NA	0.00206612	NA	NA	NA	NA
ID3	0.00616333	NA	0.00314465	NA	NA	NA	NA
ERRFI1	0.00924499	0	NA	NA	NA	NA	NA
HLA-A	0.00924499	0	NA	NA	NA	NA	NA
HOXB13	0.00924499	0	NA	NA	NA	NA	NA
RAD51B	0.00867888	0	NA	NA	NA	NA	NA
QKI	NA	0	0.00826446	NA	NA	NA	NA
PDCD1LG2	NA	0	0.00733753	NA	NA	NA	NA
PIM1	0.00578592	NA	0.00104822	NA	NA	NA	NA
TOP1	0.00675024	0	NA	NA	NA	NA	NA
RAD51C	0.00675024	0	NA	NA	NA	NA	NA
TMPRSS2	0.00675024	0	NA	NA	NA	NA	NA
XRCC2	0.00616333	0	NA	NA	NA	NA	NA
SDHAF2	0.00289296	NA	0.00314465	NA	NA	NA	NA
CDKN2B-AS1	0.00308166	NA	0.00206612	NA	NA	NA	NA
RAD51D	0.0048216	0	NA	NA	NA	NA	NA
RAD54L	0.00385728	0	NA	NA	NA	NA	NA
SMARCD1	0.00289296	0	NA	NA	NA	NA	NA
CBFB	0.00192864	0	NA	NA	NA	NA	NA
FAM175A	0.00192864	0	NA	NA	NA	NA	NA
RAD51	0.00192864	0	NA	NA	NA	NA	NA
GREM1	0.00096432	0	NA	NA	NA	NA	NA
MRE11	0.00096432	0	NA	NA	NA	NA	NA
LRP1B	NA	0.333333	NA	NA	NA	NA	NA
DMD	NA	NA	0.140461	NA	NA	NA	NA
RANBP2	NA	0.136364	NA	NA	NA	NA	NA
RUNX1T1	NA	0.128205	NA	NA	NA	NA	NA
KAT6A	NA	0.115385	NA	NA	NA	NA	NA
GPR124	NA	0.0909091	NA	NA	NA	NA	NA
GRM3	NA	0.0909091	NA	NA	NA	NA	NA
HSD3B1	NA	0.0909091	NA	NA	NA	NA	NA
KEL	NA	0.0909091	NA	NA	NA	NA	NA
MAGI2	NA	0.0909091	NA	NA	NA	NA	NA
SPTA1	NA	0.0909091	NA	NA	NA	NA	NA
SETBP1	NA	NA	0.0901468	NA	NA	NA	NA
ZNF703	NA	0.0897436	NA	NA	NA	NA	NA
TLR4	NA	NA	0.0867769	NA	NA	NA	NA
GLI3	NA	NA	0.0838574	NA	NA	NA	NA
PTPRT	0.0819672	NA	NA	NA	NA	NA	NA
CDKN2Ap14ARF	0.0800386	NA	NA	NA	NA	NA	NA
CDKN2Ap16INK4A	0.0800386	NA	NA	NA	NA	NA	NA
FRS2	NA	0.0681818	NA	NA	NA	NA	NA
SLIT2	NA	0.0681818	NA	NA	NA	NA	NA
KLHL6	NA	0.0641026	NA	NA	NA	NA	NA
CUX1	NA	NA	0.0555556	NA	NA	NA	NA
GLI2	NA	NA	0.0545073	NA	NA	NA	NA
MGA	0.0508475	NA	NA	NA	NA	NA	NA
FOXA1	0.0501446	NA	NA	NA	NA	NA	NA
ZFHX3	0.0493066	NA	NA	NA	NA	NA	NA
CHD4	NA	0.0454545	NA	NA	NA	NA	NA
PREX2	NA	0.0454545	NA	NA	NA	NA	NA
PAK7	0.0405014	NA	NA	NA	NA	NA	NA
C11orf30	NA	0.0384615	NA	NA	NA	NA	NA
FGF10	NA	0.0384615	NA	NA	NA	NA	NA
ADGRA2	NA	0.0384615	NA	NA	NA	NA	NA
FGF14	NA	0.0384615	NA	NA	NA	NA	NA
CADM2	NA	NA	0.0371901	NA	NA	NA	NA
TET1	0.0337512	NA	NA	NA	NA	NA	NA
MECOM	NA	NA	0.033543	NA	NA	NA	NA
SLITRK6	NA	NA	0.0330579	NA	NA	NA	NA
KDM6B	NA	NA	0.0324948	NA	NA	NA	NA
WRN	NA	NA	0.0324948	NA	NA	NA	NA
CIITA	NA	NA	0.0314465	NA	NA	NA	NA
DEPDC5	NA	NA	0.0309917	NA	NA	NA	NA
KCNQ3	NA	0.0294118	NA	NA	NA	NA	NA
SBNO2	NA	0.0294118	NA	NA	NA	NA	NA
SFRP1	NA	0.0294118	NA	NA	NA	NA	NA
TP63	0.0289296	NA	NA	NA	NA	NA	NA
STAT6	NA	NA	0.0283019	NA	NA	NA	NA
CBLB	NA	NA	0.0283019	NA	NA	NA	NA
RASA1	0.0279653	NA	NA	NA	NA	NA	NA
EXT1	NA	NA	0.0272537	NA	NA	NA	NA
ARFRP1	NA	0.025641	NA	NA	NA	NA	NA
BCL2L2	NA	0.025641	NA	NA	NA	NA	NA
CTNNA1	NA	0.025641	NA	NA	NA	NA	NA
GID4	NA	0.025641	NA	NA	NA	NA	NA
SMC1A	NA	NA	0.0251572	NA	NA	NA	NA
PGR	0.0246533	NA	NA	NA	NA	NA	NA
PRPF8	NA	NA	0.024109	NA	NA	NA	NA
STAG1	NA	NA	0.024109	NA	NA	NA	NA
PAK1	0.024108	NA	NA	NA	NA	NA	NA
EIF4A2	0.0231125	NA	NA	NA	NA	NA	NA
PRF1	NA	NA	0.0230608	NA	NA	NA	NA
ABL2	NA	0.0227273	NA	NA	NA	NA	NA
ACVR1B	NA	0.0227273	NA	NA	NA	NA	NA
CHD2	NA	0.0227273	NA	NA	NA	NA	NA
GABRA6	NA	0.0227273	NA	NA	NA	NA	NA
HSP90AA1	NA	0.0227273	NA	NA	NA	NA	NA
LYN	NA	0.0227273	NA	NA	NA	NA	NA
LZTR1	NA	0.0227273	NA	NA	NA	NA	NA
SNCAIP	NA	0.0227273	NA	NA	NA	NA	NA
TAF1	NA	0.0227273	NA	NA	NA	NA	NA
AGFG2	NA	0.0227273	NA	NA	NA	NA	NA
PLXDC1	NA	0.0227273	NA	NA	NA	NA	NA
ZNF233	NA	0.0227273	NA	NA	NA	NA	NA
MDC1	0.0221794	NA	NA	NA	NA	NA	NA
MYBL1	NA	NA	0.0209644	NA	NA	NA	NA
LATS1	0.0202507	NA	NA	NA	NA	NA	NA
PDCD1	0.0202507	NA	NA	NA	NA	NA	NA
XPC	NA	NA	0.0199161	NA	NA	NA	NA
RIT1	0.0192864	NA	NA	NA	NA	NA	NA
FKBP9	NA	NA	0.0188679	NA	NA	NA	NA
PRAME	NA	NA	0.0188679	NA	NA	NA	NA
PRKCZ	NA	NA	0.0188679	NA	NA	NA	NA
RHPN2	NA	NA	0.0188679	NA	NA	NA	NA
ZNF708	NA	NA	0.0188679	NA	NA	NA	NA
ANKRD11	0.01849	NA	NA	NA	NA	NA	NA
ASXL2	0.0183221	NA	NA	NA	NA	NA	NA
BUB1B	NA	NA	0.0178197	NA	NA	NA	NA
EXT2	NA	NA	0.0178197	NA	NA	NA	NA
SOX17	0.0173578	NA	NA	NA	NA	NA	NA
DCUN1D1	0.0163934	NA	NA	NA	NA	NA	NA
IRS1	0.0163934	NA	NA	NA	NA	NA	NA
RBL2	NA	NA	0.0157233	NA	NA	NA	NA
SF1	NA	NA	0.0157233	NA	NA	NA	NA
SMC3	NA	NA	0.0157233	NA	NA	NA	NA
PRPF40B	NA	NA	0.0157233	NA	NA	NA	NA
BIRC3	0.0154083	NA	NA	NA	NA	NA	NA
IKZF3	NA	NA	0.0146751	NA	NA	NA	NA
AXIN2	0.0144648	NA	NA	NA	NA	NA	NA
DNMT3B	0.0144648	NA	NA	NA	NA	NA	NA
PLK2	0.0144648	NA	NA	NA	NA	NA	NA
NPRL3	NA	NA	0.0144628	NA	NA	NA	NA
INHA	0.0138675	NA	NA	NA	NA	NA	NA
NFKBIZ	NA	NA	0.0136268	NA	NA	NA	NA
CRTC2	NA	NA	0.0136268	NA	NA	NA	NA
HIST1H1C	0.0135005	NA	NA	NA	NA	NA	NA
HIST1H3B	0.0135005	NA	NA	NA	NA	NA	NA
MAX	0.0135005	NA	NA	NA	NA	NA	NA
TRAF7	0.0135005	NA	NA	NA	NA	NA	NA
YES1	0.0135005	NA	NA	NA	NA	NA	NA
CD74	0.0135005	NA	NA	NA	NA	NA	NA
BTG1	NA	0.0128205	NA	NA	NA	NA	NA
FANCL	NA	0.0128205	NA	NA	NA	NA	NA
FGF23	NA	0.0128205	NA	NA	NA	NA	NA
FGF6	NA	0.0128205	NA	NA	NA	NA	NA
GNA13	NA	0.0128205	NA	NA	NA	NA	NA
PRSS8	NA	0.0128205	NA	NA	NA	NA	NA
STAT4	NA	0.0128205	NA	NA	NA	NA	NA
WISP3	NA	0.0128205	NA	NA	NA	NA	NA
EMSY	NA	0.0128205	NA	NA	NA	NA	NA
BCR	NA	0.0128205	NA	NA	NA	NA	NA
LATS2	0.0125362	NA	NA	NA	NA	NA	NA
MYOD1	0.0125362	NA	NA	NA	NA	NA	NA
PIK3R3	0.0125362	NA	NA	NA	NA	NA	NA
SH2D1A	0.0125362	NA	NA	NA	NA	NA	NA
TGFBR1	0.0125362	NA	NA	NA	NA	NA	NA
ARID5B	0.0125362	NA	NA	NA	NA	NA	NA
DNMT1	0.0125362	NA	NA	NA	NA	NA	NA
FOXO1	0.0123267	NA	NA	NA	NA	NA	NA
MALT1	0.0123267	NA	NA	NA	NA	NA	NA
PPM1D	0.0123267	NA	NA	NA	NA	NA	NA
INPP4A	0.0115718	NA	NA	NA	NA	NA	NA
PTPRS	0.0115718	NA	NA	NA	NA	NA	NA
RPS6KA4	0.0115718	NA	NA	NA	NA	NA	NA
CRTC1	NA	NA	0.0115304	NA	NA	NA	NA
PTK2	NA	NA	0.0115304	NA	NA	NA	NA
TCF7L1	NA	NA	0.0115304	NA	NA	NA	NA
FYN	0.0107858	NA	NA	NA	NA	NA	NA
HIST1H3G	0.0107858	NA	NA	NA	NA	NA	NA
HIST1H3J	0.0107858	NA	NA	NA	NA	NA	NA
STAT5B	0.0107858	NA	NA	NA	NA	NA	NA
E2F3	0.0106075	NA	NA	NA	NA	NA	NA
EIF1AX	0.0106075	NA	NA	NA	NA	NA	NA
GPC3	NA	NA	0.0104822	NA	NA	NA	NA
KCNIP1	NA	NA	0.0103306	NA	NA	NA	NA
SQSTM1	NA	NA	0.0103306	NA	NA	NA	NA
XIAP	0.0096432	NA	NA	NA	NA	NA	NA
H3F3C	0.0096432	NA	NA	NA	NA	NA	NA
GSTM5	NA	NA	0.00943396	NA	NA	NA	NA
HIST1H3H	0.00924499	NA	NA	NA	NA	NA	NA
NCOA3	0.00924499	NA	NA	NA	NA	NA	NA
RPS6KB2	0.00867888	NA	NA	NA	NA	NA	NA
KLF4	0.00867888	NA	NA	NA	NA	NA	NA
BCL2L12	NA	NA	0.00838574	NA	NA	NA	NA
PSMD13	NA	NA	0.00838574	NA	NA	NA	NA
SBDS	NA	NA	0.00838574	NA	NA	NA	NA
FUS	NA	NA	0.00826446	NA	NA	NA	NA
INSIG1	NA	NA	0.00826446	NA	NA	NA	NA
HIST1H2BD	0.00771456	NA	NA	NA	NA	NA	NA
CTLA4	0.00771456	NA	NA	NA	NA	NA	NA
IL10	0.00771456	NA	NA	NA	NA	NA	NA
YAP1	0.00771456	NA	NA	NA	NA	NA	NA
MST1	0.00770416	NA	NA	NA	NA	NA	NA
CDK9	NA	NA	0.00733753	NA	NA	NA	NA
CDKN1C	NA	NA	0.00733753	NA	NA	NA	NA
PHF6	NA	NA	0.00733753	NA	NA	NA	NA
PIK3CD	0.00675024	NA	NA	NA	NA	NA	NA
RHOA	0.00675024	NA	NA	NA	NA	NA	NA
IFNGR1	0.00675024	NA	NA	NA	NA	NA	NA
CD58	NA	NA	0.00628931	NA	NA	NA	NA
CDK5	NA	NA	0.00628931	NA	NA	NA	NA
GNB2L1	NA	NA	0.00619835	NA	NA	NA	NA
ACVR1	0.00616333	NA	NA	NA	NA	NA	NA
CXCR4	0.00616333	NA	NA	NA	NA	NA	NA
HIST1H3A	0.00616333	NA	NA	NA	NA	NA	NA
HIST1H3D	0.00616333	NA	NA	NA	NA	NA	NA
HIST1H3I	0.00616333	NA	NA	NA	NA	NA	NA
HIST3H3	0.00616333	NA	NA	NA	NA	NA	NA
ELOC	0.00616333	NA	NA	NA	NA	NA	NA
SH2B2	NA	NA	0.00524109	NA	NA	NA	NA
DDB2	NA	NA	0.00524109	NA	NA	NA	NA
LMO2	NA	NA	0.00524109	NA	NA	NA	NA
ICOSLG	0.0048216	NA	NA	NA	NA	NA	NA
SHQ1	0.0048216	NA	NA	NA	NA	NA	NA
HIST2H3D	0.0046225	NA	NA	NA	NA	NA	NA
STAT5A	0.0046225	NA	NA	NA	NA	NA	NA
TRAF2	0.0046225	NA	NA	NA	NA	NA	NA
HIST2H3C	0.0046225	NA	NA	NA	NA	NA	NA
KCNK12	NA	NA	0.00425532	NA	NA	NA	NA
CDK1	NA	NA	0.00419287	NA	NA	NA	NA
LMO3	NA	NA	0.00419287	NA	NA	NA	NA
XPA	NA	NA	0.00419287	NA	NA	NA	NA
NPRL2	NA	NA	0.00413223	NA	NA	NA	NA
RP11-435O5.4	NA	NA	0.00413223	NA	NA	NA	NA
PDPK1	0.00385728	NA	NA	NA	NA	NA	NA
VTCN1	0.00385728	NA	NA	NA	NA	NA	NA
BBC3	0.00385728	NA	NA	NA	NA	NA	NA
EGFL7	0.00385728	NA	NA	NA	NA	NA	NA
PMAIP1	0.00385728	NA	NA	NA	NA	NA	NA
RPL26	NA	NA	0.00314465	NA	NA	NA	NA
BCL10	0.00308166	NA	NA	NA	NA	NA	NA
CALR	0.00308166	NA	NA	NA	NA	NA	NA
DNAJB1	0.00308166	NA	NA	NA	NA	NA	NA
EIF4E	0.00308166	NA	NA	NA	NA	NA	NA
H3F3B	0.00308166	NA	NA	NA	NA	NA	NA
HIST1H3C	0.00308166	NA	NA	NA	NA	NA	NA
HIST1H3E	0.00308166	NA	NA	NA	NA	NA	NA
HIST1H3F	0.00308166	NA	NA	NA	NA	NA	NA
MAP3K14	0.00308166	NA	NA	NA	NA	NA	NA
MAPK3	0.00308166	NA	NA	NA	NA	NA	NA
BCL2L11	0.00289296	NA	NA	NA	NA	NA	NA
CD276	0.00289296	NA	NA	NA	NA	NA	NA
NKX3-1	0.00289296	NA	NA	NA	NA	NA	NA
RYBP	0.00289296	NA	NA	NA	NA	NA	NA
EZR	0.00289296	NA	NA	NA	NA	NA	NA
LDLR	0.00289296	NA	NA	NA	NA	NA	NA
SDC4	0.00289296	NA	NA	NA	NA	NA	NA
RP11-211G3.3	0.00257732	NA	NA	NA	NA	NA	NA
CAMK2D	0.00257732	NA	NA	NA	NA	NA	NA
CLIP4	0.00257732	NA	NA	NA	NA	NA	NA
CUBN	0.00257732	NA	NA	NA	NA	NA	NA
EPHX3	0.00257732	NA	NA	NA	NA	NA	NA
FLG2	0.00257732	NA	NA	NA	NA	NA	NA
MYT1	0.00257732	NA	NA	NA	NA	NA	NA
NCOA4	0.00257732	NA	NA	NA	NA	NA	NA
PBDC1	0.00257732	NA	NA	NA	NA	NA	NA
PHF7	0.00257732	NA	NA	NA	NA	NA	NA
RASSF4	0.00257732	NA	NA	NA	NA	NA	NA
RGL1	0.00257732	NA	NA	NA	NA	NA	NA
USP48	0.00257732	NA	NA	NA	NA	NA	NA
ZBTB40	0.00257732	NA	NA	NA	NA	NA	NA
CDK2	NA	NA	0.00209644	NA	NA	NA	NA
FAM20A	NA	NA	0.00206612	NA	NA	NA	NA
INSRR	NA	NA	0.00206612	NA	NA	NA	NA
CCDC6	0.00192864	NA	NA	NA	NA	NA	NA
MIDN	0.00192864	NA	NA	NA	NA	NA	NA
MTAP	0.00192864	NA	NA	NA	NA	NA	NA
SLC34A2	0.00192864	NA	NA	NA	NA	NA	NA
CENPA	0.00154083	NA	NA	NA	NA	NA	NA
GPS2	0.00154083	NA	NA	NA	NA	NA	NA
KMT2B	0.00154083	NA	NA	NA	NA	NA	NA
AGK	0.00154083	NA	NA	NA	NA	NA	NA
AKAP8	0.00154083	NA	NA	NA	NA	NA	NA
CLHC1	0.00154083	NA	NA	NA	NA	NA	NA
CSMD1	0.00154083	NA	NA	NA	NA	NA	NA
DAZAP2	0.00154083	NA	NA	NA	NA	NA	NA
DNAH2	0.00154083	NA	NA	NA	NA	NA	NA
DYSF	0.00154083	NA	NA	NA	NA	NA	NA
EMID1	0.00154083	NA	NA	NA	NA	NA	NA
FAM135B	0.00154083	NA	NA	NA	NA	NA	NA
GALNT11	0.00154083	NA	NA	NA	NA	NA	NA
GCC2	0.00154083	NA	NA	NA	NA	NA	NA
KANSL1	0.00154083	NA	NA	NA	NA	NA	NA
MCF2L2	0.00154083	NA	NA	NA	NA	NA	NA
MESP2	0.00154083	NA	NA	NA	NA	NA	NA
MSL3	0.00154083	NA	NA	NA	NA	NA	NA
MYEOV	0.00154083	NA	NA	NA	NA	NA	NA
MYH14	0.00154083	NA	NA	NA	NA	NA	NA
NBPF4	0.00154083	NA	NA	NA	NA	NA	NA
NRG1	0.00154083	NA	NA	NA	NA	NA	NA
OXSR1	0.00154083	NA	NA	NA	NA	NA	NA
P2RY8	0.00154083	NA	NA	NA	NA	NA	NA
PJA2	0.00154083	NA	NA	NA	NA	NA	NA
RFC4	0.00154083	NA	NA	NA	NA	NA	NA
RPS29	0.00154083	NA	NA	NA	NA	NA	NA
SLC16A7	0.00154083	NA	NA	NA	NA	NA	NA
SLIT3	0.00154083	NA	NA	NA	NA	NA	NA
SND1	0.00154083	NA	NA	NA	NA	NA	NA
SOX2-OT	0.00154083	NA	NA	NA	NA	NA	NA
SP2	0.00154083	NA	NA	NA	NA	NA	NA
TAC4	0.00154083	NA	NA	NA	NA	NA	NA
TAOK1	0.00154083	NA	NA	NA	NA	NA	NA
TNS3	0.00154083	NA	NA	NA	NA	NA	NA
TUSC1	0.00154083	NA	NA	NA	NA	NA	NA
USP34	0.00154083	NA	NA	NA	NA	NA	NA
VANGL2	0.00154083	NA	NA	NA	NA	NA	NA
VWA3B	0.00154083	NA	NA	NA	NA	NA	NA
ZBP1	0.00154083	NA	NA	NA	NA	NA	NA
ZCCHC6	0.00154083	NA	NA	NA	NA	NA	NA
ZMAT4	0.00154083	NA	NA	NA	NA	NA	NA
ZNF257	0.00154083	NA	NA	NA	NA	NA	NA
STK40	0.00096432	NA	NA	NA	NA	NA	NA
EPCAM	0.00096432	NA	NA	NA	NA	NA	NA

## Sheet: Breast Cancer
	MSK	VICC	DFCI	GRCC	UHN	MDA
TP53	0.410638	0.584158	0.403685	0.353659	0.347561	0.386266
PIK3CA	0.358511	0.361386	0.366834	0.256098	0.335366	0.381974
ERBB2	0.182979	0.188119	0.169179	0.0121951	0.0182927	0.00858369
PTEN	0.0925532	0.108911	0.0720268	0.0365854	0.0731707	0.0128755
CDH1	0.148936	0.0940594	0.122278	0	0.00609756	0
FGFR1	0.124468	0.138614	0.0753769	0.0121951	0	0.00429185
AKT1	0.0648936	0.049505	0.0351759	0.0609756	0.0121951	0.0901288
GNAS	0.0617021	0.123762	0.0351759	0	0	0
RB1	0.0340426	0.0742574	0.0469012	0	0.0426829	0
CDKN2A	0.0329787	0.0643564	0.0318258	0.0121951	0.0365854	0.00429185
ATM	0.0382979	0.0693069	0.0452261	0	0.0243902	0.00429185
APC	0.0138298	0.0693069	0.040201	0.0121951	0.0121951	0.00858369
EGFR	0.0340426	0.0445545	0.0234506	0.0121951	0.0182927	0.00429185
SMAD4	0.0234043	0.039604	0.0167504	0.0121951	0.0121951	0.0171674
NOTCH1	0.0244681	0.0346535	0.0335008	0	0.0182927	0.00429185
KDR	0.0138298	0.0346535	0.0234506	0.0243902	0.0121951	0.00429185
FGFR3	0.0138298	0.0148515	0.0167504	0.0121951	0.0487805	0
ALK	0.0170213	0.0346535	0.0335008	0.0121951	0.00609756	0
JAK2	0.0159574	0.049505	0.0251256	0	0.00609756	0
SMO	0.00851064	0.029703	0.0150754	0	0.0365854	0
RET	0.00851064	0.029703	0.0318258	0	0.0182927	0
KIT	0.0117021	0.0148515	0.0268007	0.0243902	0.00609756	0.00429185
KRAS	0.0148936	0.0247525	0.0184255	0.0121951	0.00609756	0.00858369
PDGFRA	0.0159574	0.0346535	0.0201005	0	0.0121951	0
JAK3	0.0265957	0.029703	0.0217755	0	0	0.00429185
STK11	0.0148936	0.029703	0.0184255	0.0121951	0.00609756	0
FBXW7	0.0170213	0.0148515	0.0184255	0.0243902	0.00609756	0
ABL1	0.00851064	0.0148515	0.0150754	0	0.0304878	0.00858369
ERBB4	0.0170213	0.0346535	0.0201005	0	0	0.00429185
MET	0.0106383	0.039604	0.0150754	0	0.00609756	0.00429185
FGFR2	0.0265957	0.0148515	0.0184255	0	0.00609756	0.00429185
HRAS	0.00531915	0.0049505	0.00502513	0	0.0365854	0.0128755
SRC	0.0117021	0.0346535	0.00670017	0	0	0.00429185
MPL	0.0148936	0.019802	0.0134003	0	0	0.00858369
FLT3	0.0138298	0.019802	0.0134003	0	0.00609756	0
NRAS	0.00425532	0.0247525	0.00335008	0	0.0121951	0.00429185
SMARCB1	0.0106383	0.029703	0.00837521	0	0	0
HNF1A	0.00851064	0	0.0100503	0	0.0182927	0
NPM1	0.00319149	0.0247525	0.00837521	0	0	0
MLH1	0.00531915	0.0049505	0.0201005	0	0	0.00429185
IDH1	0.00531915	0.0049505	0.0117253	0.0121951	0	0
BRAF	0.00638298	0.0148515	0.00167504	0	0.00609756	0.00429185
VHL	0.00425532	0.00990099	0.00670017	0	0.0121951	0
CSF1R	0.00744681	0.0049505	0.0187668	0	0	0
PTPN11	0.00425532	0.00990099	0.00502513	0	0.00609756	0.00429185
CTNNB1	0.00319149	0.0049505	0.0117253	0	0	0
GNA11	0.00319149	0.0247525	0.0117253	0	0.103659	NA
GNAQ	0.00319149	0.0049505	0.00335008	0	0	NA
NF1	0.0638298	0.0940594	0.0586265	0.0810811	NA	NA
MAP3K1	0.0861702	0.0594059	0.0686767	0.027027	NA	NA
BRCA2	0.0425532	0.0693069	0.0737018	0.0405405	NA	NA
MAP2K4	0.0531915	0.0792079	0.0435511	0.027027	NA	NA
NOTCH2	0.0382979	0.113861	0.0318258	0	NA	NA
TSC2	0.0212766	0.0792079	0.0301508	0.027027	NA	NA
FLT1	0.0170213	0.0594059	0.0301508	0.027027	NA	NA
BRCA1	0.0234043	0.0247525	0.038526	0.0405405	NA	NA
ROS1	0.0234043	0.0346535	0.0519263	0	NA	NA
AKT3	0.0170213	0.0594059	0.0167504	0	NA	NA
DDR2	0.0212766	0.0594059	0.0117253	0	NA	NA
ERBB3	0.0255319	0.0148515	0.0217755	0.027027	NA	NA
MTOR	0.0191489	0.0247525	0.0301508	0.0135135	NA	NA
TSC1	0.00744681	0.0346535	0.0217755	0.0135135	NA	NA
KEAP1	0.00531915	0.0148515	0.0134048	0.0405405	NA	NA
NFE2L2	0.00851064	0.039604	0.0100503	0.0135135	NA	NA
PIK3R1	0.0202128	0.0247525	0.0234506	0	NA	NA
FGFR4	0.0191489	0.0049505	0.0184255	0.0135135	NA	NA
AKT2	0.00957447	0.0247525	0.0150754	0	NA	NA
IDH2	0.0148936	0.0247525	0.00837521	0	NA	NA
EZH2	0.00957447	0.0247525	0.00670017	0	NA	NA
MAP2K1	0.00744681	0.00990099	0.00670017	0	NA	NA
CCND1	0.196809	0.143564	0.128978	NA	NA	NA
GATA3	0.161702	0.168317	0.0988275	NA	NA	NA
MYC	0.0946809	0.222772	0.0586265	NA	NA	NA
ARID1A	0.0595745	0.143564	0.0569514	NA	NA	NA
ESR1	0.11383	0.0742574	0.0569514	NA	NA	NA
KMT2C	0.0829787	0.158879	NA	0	NA	NA
MCL1	0.0553191	0.128713	0.0351759	NA	NA	NA
KMT2D	0.0297872	0.0940594	0.0753769	NA	NA	NA
BRIP1	0.0553191	0.0940594	0.0435511	NA	NA	NA
ARID1B	0.0191489	0.0934579	0.0452261	NA	NA	NA
CREBBP	0.0319149	0.0792079	0.0301508	NA	NA	NA
KMT2A	0.0308511	0.0594059	0.0452261	NA	NA	NA
PRKAR1A	0.0393617	0.0742574	0.0217755	NA	NA	NA
MDM4	0.0361702	0.0693069	0.0251256	NA	NA	NA
AURKA	0.0457447	0.0643564	0.0134003	NA	NA	NA
CD79B	0.0361702	0.0693069	0.0150754	NA	NA	NA
IGF1R	0.0340426	0.0544554	0.0301508	NA	NA	NA
MDM2	0.043617	0.039604	0.0351759	NA	NA	NA
RARA	0.0457447	0.0346535	0.0301508	NA	NA	NA
EP300	0.0159574	0.0643564	0.0284757	NA	NA	NA
FH	0.0191489	0.0747664	0.0100503	NA	NA	NA
ARID2	0.0329787	0.0346535	0.0351759	NA	NA	NA
PRDM1	0.0329787	0.049505	0.0184255	NA	NA	NA
CDKN2B	0.0255319	0.049505	0.0251256	NA	NA	NA
ATRX	0.0148936	0.049505	0.0351759	NA	NA	NA
FANCA	0.00425532	0.0594059	0.0351759	NA	NA	NA
SDHC	0.0117021	0.0747664	0.0117253	NA	NA	NA
SETD2	0.0191489	0.039604	0.0351759	NA	NA	NA
CCNE1	0.0180851	0.0544554	0.0201005	NA	NA	NA
CDC73	0.0202128	0.049505	0.0217755	NA	NA	NA
NBN	0.0617021	0	0.0284757	NA	NA	NA
NTRK1	0.012766	0.049505	0.0251256	NA	NA	NA
SF3B1	0.0191489	0.0445545	0.0234506	NA	NA	NA
RUNX1	0.037234	0.0247525	0.0251256	NA	NA	NA
CDKN1B	0.0404255	0.029703	0.0150754	NA	NA	NA
H3F3A	0.0137255	0.0560748	0.0150754	NA	NA	NA
BLM	0.0138298	0.0445545	0.0217755	NA	NA	NA
ASXL1	0.00957447	0.049505	0.0201005	NA	NA	NA
SMARCA4	0.0138298	0.029703	0.0335008	NA	NA	NA
FLT4	0.0180851	0.029703	0.0284757	NA	NA	NA
SDHA	0.0106383	0.046729	0.0187668	NA	NA	NA
IKZF1	0.0202128	0.039604	0.0150754	NA	NA	NA
DICER1	0.012766	0.046729	0.0150754	NA	NA	NA
TNFAIP3	0.012766	0.0445545	0.0167504	NA	NA	NA
DNMT3A	0.0191489	0.019802	0.0301508	NA	NA	NA
KDM6A	0.0202128	0.0247525	0.0234506	NA	NA	NA
CARD11	0.0212766	0.029703	0.0150754	NA	NA	NA
TET2	0.0138298	0.029703	0.0217755	NA	NA	NA
INPP4B	0.00531915	0.0186916	NA	0.0405405	NA	NA
PBRM1	0.012766	0.0247525	0.0268097	NA	NA	NA
PTPRD	0.0287234	0	0.0321716	NA	NA	NA
FANCC	0.00744681	0.039604	0.0134003	NA	NA	NA
EPHA3	0.0106383	0.029703	0.0201005	NA	NA	NA
PTCH1	0.012766	0.0247525	0.0217755	NA	NA	NA
PALB2	0.0159574	0.019802	0.0234506	NA	NA	NA
GLI1	0.0137255	0.0280374	0.0167504	NA	NA	NA
MSH6	0.00531915	0.0346535	0.0184255	NA	NA	NA
PDGFRB	0.00638298	0.029703	0.0201005	NA	NA	NA
FLCN	0.00851064	0.0373832	0.0100503	NA	NA	NA
BAP1	0.012766	0.0346535	0.00837521	NA	NA	NA
EPHA7	0.0196078	0.0186916	0.0167504	NA	NA	NA
BCOR	0.0191489	0.019802	0.0150754	NA	NA	NA
STAT3	0.0156863	0.0280374	0.0100503	NA	NA	NA
AXL	0.0117021	0.0247525	0.0167504	NA	NA	NA
SOX9	0.0297872	0.00934579	0.0134003	NA	NA	NA
EPHA5	0.0138298	0.019802	0.0184255	NA	NA	NA
STAG2	0.0255319	0.019802	0.00670017	NA	NA	NA
BRD4	0.0159574	0.0186916	0.0167504	NA	NA	NA
MEN1	0.0212766	0.00990099	0.0201005	NA	NA	NA
ERCC4	0.0180851	0	0.0318258	NA	NA	NA
BCL6	0.00957447	0.029703	0.0100503	NA	NA	NA
WT1	0.012766	0.0247525	0.0117253	NA	NA	NA
CHEK2	0.00425532	0.0247525	0.0201005	NA	NA	NA
CBL	0.0106383	0.019802	0.0167504	NA	NA	NA
CEBPA	0.00392157	0.039604	0.00335008	NA	NA	NA
MYCN	0.00531915	0.0247525	0.0134003	NA	NA	NA
BCL2L1	0.00425532	0.0373832	0.00167504	NA	NA	NA
CCND3	0.00638298	0.029703	0.00670017	NA	NA	NA
NTRK3	0.00744681	0.0148515	0.0201005	NA	NA	NA
AR	0.0170213	0.0049505	0.0201005	NA	NA	NA
SYK	0.00531915	0.019802	0.0167504	NA	NA	NA
PMS2	0.00638298	0.019802	0.0150754	NA	NA	NA
CDK6	0.00744681	0.029703	0.00335008	NA	NA	NA
SMAD2	0.00531915	0.029703	0.00502513	NA	NA	NA
ARAF	0.00638298	0.019802	0.0117253	NA	NA	NA
CD274	0.0106383	0.0186916	0.00837521	NA	NA	NA
MSH2	0.00425532	0.0148515	0.0184255	NA	NA	NA
PPP2R1A	0.0223404	0.0148515	NA	0	NA	NA
RAF1	0.00851064	0.0247525	0.00335008	NA	NA	NA
NFKBIA	0.00980392	0.0148515	0.0117253	NA	NA	NA
NF2	0.00957447	0.0148515	0.0117253	NA	NA	NA
MUTYH	0.00425532	0.019802	0.0117253	NA	NA	NA
XPO1	0.00957447	0.00990099	0.0150754	NA	NA	NA
SOX2	0.0106383	0.0148515	0.00837521	NA	NA	NA
MYCL	0.00638298	0.0148515	0.0117253	NA	NA	NA
MEF2B	0.00638298	0.019802	0.00670017	NA	NA	NA
ETV6	0.0159574	0	0.0167504	NA	NA	NA
PARK2	0.00744681	0.00934579	0.0150754	NA	NA	NA
CDK4	0.0191489	0.0049505	0.00670017	NA	NA	NA
DIS3	0.00638298	0	0.0234506	NA	NA	NA
TERT	0.0180851	0	0.0117253	NA	NA	NA
KDM5C	0.0148936	0.0049505	0.0080429	NA	NA	NA
CDKN2C	0.00425532	0.0148515	0.00837521	NA	NA	NA
EWSR1	0.00196078	0.00990099	0.0150754	NA	NA	NA
NKX2-1	0.00851064	0.0148515	0.00335008	NA	NA	NA
CCND2	0.00957447	0.00990099	0.00502513	NA	NA	NA
ALOX12B	0.00744681	0	0.0167504	NA	NA	NA
ERCC2	0.00851064	0	0.0150754	NA	NA	NA
NTRK2	0.00531915	0.0148515	0.00335008	NA	NA	NA
SUFU	0.00319149	0.0148515	0.00335008	NA	NA	NA
SH2B3	0.00784314	0	0.0117253	NA	NA	NA
NOTCH4	0.0191489	0	NA	0	NA	NA
PAX5	0.00531915	0.00990099	0.00335008	NA	NA	NA
U2AF1	0.00638298	0.00934579	0.00167504	NA	NA	NA
CRLF2	0.0106383	0.0049505	0.00167504	NA	NA	NA
REL	0.00638298	0	0.0100503	NA	NA	NA
SDHB	0.00531915	0.00934579	0.00167504	NA	NA	NA
SDHD	0.00212766	0.00934579	0.00335008	NA	NA	NA
BMPR1A	0.00425532	0	0.0100503	NA	NA	NA
PNRC1	0.00531915	0	0.00837521	NA	NA	NA
ETV1	0.00319149	0	0.0100503	NA	NA	NA
BCL2	0.00319149	0.00990099	0	NA	NA	NA
MITF	0.00106383	0.0049505	0.00670017	NA	NA	NA
CDKN1A	0.00744681	0	0.00502513	NA	NA	NA
CRKL	0.00212766	0.0049505	0.00502513	NA	NA	NA
AURKB	0.00212766	0	0.00837521	NA	NA	NA
SOCS1	0.00638298	0	0.00335008	NA	NA	NA
FAM46C	0.00531915	0	0.00335008	NA	NA	NA
LMO1	0.00212766	0.0049505	0	NA	NA	NA
MYD88	0.00212766	0	0.00167504	NA	NA	NA
FGF19	0.168085	0.143564	NA	NA	NA	NA
FGF3	0.146809	0.153465	NA	NA	NA	NA
FGF4	0.156383	0.143564	NA	NA	NA	NA
CDK12	0.115957	0.138614	NA	NA	NA	NA
PRKDC	NA	0.158416	0.078727	NA	NA	NA
ZNF217	NA	0.148515	0.040201	NA	NA	NA
FAT1	0.0425532	0.130841	NA	NA	NA	NA
PIK3C2B	NA	0.0934579	0.040201	NA	NA	NA
RECQL4	0.0670213	NA	0.0589812	NA	NA	NA
SPOP	0.0542553	0.0643564	NA	NA	NA	NA
RAD21	0.072549	NA	0.0452261	NA	NA	NA
IKBKE	0.0351064	0.0742574	NA	NA	NA	NA
RNF43	0.0425532	0.0643564	NA	NA	NA	NA
MED12	0.0212766	0.0792079	NA	NA	NA	NA
TBX3	0.0712766	0.0247525	NA	NA	NA	NA
SPEN	0.0351064	0.0544554	NA	NA	NA	NA
RICTOR	0.0212766	0.0544554	NA	NA	NA	NA
POLE	0.0191489	0.0560748	NA	NA	NA	NA
CBFB	0.0244681	0.049505	NA	NA	NA	NA
IRS2	0.00744681	0.0643564	NA	NA	NA	NA
RPTOR	0.0138298	0.049505	NA	NA	NA	NA
NSD1	0.0265957	0.0346535	NA	NA	NA	NA
POLD1	0.0137255	0.046729	NA	NA	NA	NA
DOT1L	0.0148936	0.0445545	NA	NA	NA	NA
ATR	0.0234043	0.0346535	NA	NA	NA	NA
AMER1	0.00851064	0.049505	NA	NA	NA	NA
FANCD2	NA	0.029703	0.0268007	NA	NA	NA
KDM5A	0.0244681	0.029703	NA	NA	NA	NA
GRIN2A	0.0191489	0.0346535	NA	NA	NA	NA
PLCG2	0.00588235	0.046729	NA	NA	NA	NA
FANCG	NA	0.039604	0.0117253	NA	NA	NA
RAD51C	0.0510638	0	NA	NA	NA	NA
TOP1	0.0202128	0.029703	NA	NA	NA	NA
FANCE	NA	0.039604	0.00837521	NA	NA	NA
BARD1	0.012766	0.0346535	NA	NA	NA	NA
JAK1	0.0212766	0.0247525	NA	NA	NA	NA
HGF	0.0106383	0.0346535	NA	NA	NA	NA
VEGFA	0.00980392	0.0346535	NA	NA	NA	NA
CYLD	NA	0.0373832	0.00670017	NA	NA	NA
PIK3CB	0.0159574	0.0280374	NA	NA	NA	NA
NCOR1	0.043617	0	NA	NA	NA	NA
RFWD2	0.0212766	NA	0.0217755	NA	NA	NA
PIK3CG	0.012766	0.029703	NA	NA	NA	NA
CTCF	0.0170213	0.0247525	NA	NA	NA	NA
NOTCH3	0.0170213	0.0247525	NA	NA	NA	NA
ERG	0.0117021	0.029703	NA	NA	NA	NA
EPHB1	0.0106383	0.029703	NA	NA	NA	NA
MYB	NA	0.00934579	0.0301508	NA	NA	NA
ERCC5	0.0117021	NA	0.0268007	NA	NA	NA
BCORL1	NA	0.019802	0.0184255	NA	NA	NA
RAD50	0.012766	0.0247525	NA	NA	NA	NA
PIK3R2	0.0159574	0.019802	NA	NA	NA	NA
CIC	0.0148936	0.019802	NA	NA	NA	NA
TCF3	0.00392157	NA	0.0301508	NA	NA	NA
PDCD1LG2	NA	0.0186916	0.0150754	NA	NA	NA
FOXP1	0.0148936	0.0186916	NA	NA	NA	NA
TCF7L2	0.00980392	NA	0.0217755	NA	NA	NA
GATA1	0.00638298	0.0247525	NA	NA	NA	NA
PRKCI	NA	0.0186916	0.0117253	NA	NA	NA
DAXX	0.00957447	0.019802	NA	NA	NA	NA
CUL3	0.00957447	0.0186916	NA	NA	NA	NA
NUP93	0.00784314	0.019802	NA	NA	NA	NA
HOXB13	0.027451	0	NA	NA	NA	NA
IL7R	0.00744681	0.019802	NA	NA	NA	NA
BTK	0.00744681	0.019802	NA	NA	NA	NA
TSHR	0.00212766	0.0247525	NA	NA	NA	NA
QKI	NA	0.0186916	0.0080429	NA	NA	NA
PMS1	0.00638298	NA	0.0201005	NA	NA	NA
RAC1	0.00744681	0.0186916	NA	NA	NA	NA
JUN	0.0106383	0.0148515	NA	NA	NA	NA
TGFBR2	0.00957447	0.0148515	NA	NA	NA	NA
AXIN1	0.0148936	0.00934579	NA	NA	NA	NA
RBM10	0.0148936	0.00934579	NA	NA	NA	NA
INHBA	0.00392157	0.019802	NA	NA	NA	NA
SUZ12	0.00851064	NA	0.0150754	NA	NA	NA
PARP1	0.0234043	0	NA	NA	NA	NA
PIK3C2G	0.0234043	0	NA	NA	NA	NA
RP4-806M20.3	NA	0.0148515	0.00837521	NA	NA	NA
EED	0.00957447	NA	0.0134048	NA	NA	NA
SRSF2	0.0137255	NA	0.00837521	NA	NA	NA
CHEK1	0.00212766	0.019802	NA	NA	NA	NA
SDHAF2	0.00851064	NA	0.0117253	NA	NA	NA
CDK8	0.0138298	0.0049505	NA	NA	NA	NA
TERC	NA	0.0186916	0	NA	NA	NA
FANCF	NA	0.0049505	0.0134003	NA	NA	NA
CSF3R	0.00392157	NA	0.0134048	NA	NA	NA
ETV5	NA	0	0.0167504	NA	NA	NA
TMPRSS2	0.0117021	0.0049505	NA	NA	NA	NA
GATA4	NA	0	0.0150754	NA	NA	NA
RAD52	0.0148936	0	NA	NA	NA	NA
ERCC3	0.00638298	NA	0.00837521	NA	NA	NA
SMAD3	0.00531915	0.00934579	NA	NA	NA	NA
MRE11A	0.00465116	0.00990099	NA	NA	NA	NA
FAS	NA	0.00934579	0.00502513	NA	NA	NA
MST1R	0.0137255	0	NA	NA	NA	NA
FUBP1	0.00425532	0.00934579	NA	NA	NA	NA
ZRSR2	0.00980392	NA	0.00335008	NA	NA	NA
MAP2K2	0.00319149	0.00990099	NA	NA	NA	NA
BCAS3	0.00212766	0.0105263	NA	NA	NA	NA
RAD51D	0.0117021	0	NA	NA	NA	NA
IRF4	0.00638298	0.0049505	NA	NA	NA	NA
CD79A	0.00588235	0.0049505	NA	NA	NA	NA
MAP3K13	0.0106383	0	NA	NA	NA	NA
RAD51	0.00531915	0.0049505	NA	NA	NA	NA
ETV4	NA	0	0.0100503	NA	NA	NA
PHOX2B	0.00319149	NA	0.00670017	NA	NA	NA
FOXL2	0.00425532	0.0049505	NA	NA	NA	NA
MAPK1	0.00531915	NA	0.00335008	NA	NA	NA
INSR	0.00851064	0	NA	NA	NA	NA
RAD54L	0.00851064	0	NA	NA	NA	NA
GSK3B	0.00319149	0.0049505	NA	NA	NA	NA
TNFRSF14	0.00319149	0.0049505	NA	NA	NA	NA
GATA2	0.00744681	0	NA	NA	NA	NA
B2M	0.00212766	NA	0.00502513	NA	NA	NA
IGF2	0.00212766	0.0049505	NA	NA	NA	NA
GATA6	NA	0	0.00670017	NA	NA	NA
ID3	0	NA	0.00670017	NA	NA	NA
NEGR1	0.00392157	NA	0.00268097	NA	NA	NA
RHEB	0.00588235	NA	0	NA	NA	NA
PIM1	0.00212766	NA	0.00335008	NA	NA	NA
FAM175A	0.00531915	0	NA	NA	NA	NA
CASP8	0.00531915	0	NA	NA	NA	NA
IGF1	0.00531915	0	NA	NA	NA	NA
CDKN2B-AS1	0.00212766	NA	0.00268097	NA	NA	NA
PIK3C3	0.00425532	0	NA	NA	NA	NA
ERRFI1	0.00392157	0	NA	NA	NA	NA
HLA-A	0.00392157	0	NA	NA	NA	NA
SMARCD1	0.00319149	0	NA	NA	NA	NA
PAK5	0.00319149	0	NA	NA	NA	NA
GREM1	0.00319149	0	NA	NA	NA	NA
RAD51B	0.00319149	0	NA	NA	NA	NA
MRE11	0.00319149	0	NA	NA	NA	NA
ZNF703	NA	0.183168	NA	NA	NA	NA
SPTA1	NA	0.130841	NA	NA	NA	NA
IKZF3	NA	NA	0.130653	NA	NA	NA
RUNX1T1	NA	0.123762	NA	NA	NA	NA
KAT6A	NA	0.118812	NA	NA	NA	NA
ADGRA2	NA	0.108911	NA	NA	NA	NA
PAK1	0.101064	NA	NA	NA	NA	NA
PREX2	NA	0.0934579	NA	NA	NA	NA
ABL2	NA	0.0841121	NA	NA	NA	NA
FOXA1	0.0840426	NA	NA	NA	NA	NA
ARFRP1	NA	0.0792079	NA	NA	NA	NA
LRP1B	NA	0.0693069	NA	NA	NA	NA
GRM3	NA	0.0654206	NA	NA	NA	NA
GNA13	NA	0.0594059	NA	NA	NA	NA
DMD	NA	NA	0.0569514	NA	NA	NA
CHD2	NA	0.0560748	NA	NA	NA	NA
LYN	NA	0.0560748	NA	NA	NA	NA
MAGI2	NA	0.0560748	NA	NA	NA	NA
RANBP2	NA	0.0560748	NA	NA	NA	NA
SLIT2	NA	0.0560748	NA	NA	NA	NA
TOP2A	NA	0.0560748	NA	NA	NA	NA
EMSY	NA	0.049505	NA	NA	NA	NA
RPS6KB2	0.0478723	NA	NA	NA	NA	NA
ELOC	0.0470588	NA	NA	NA	NA	NA
HSD3B1	NA	0.046729	NA	NA	NA	NA
HSP90AA1	NA	0.046729	NA	NA	NA	NA
PPM1D	0.0404255	NA	NA	NA	NA	NA
ZFHX3	0.0392157	NA	NA	NA	NA	NA
EXT1	NA	NA	0.038526	NA	NA	NA
PTK2	NA	NA	0.038526	NA	NA	NA
CHD4	NA	0.0373832	NA	NA	NA	NA
SNCAIP	NA	0.0373832	NA	NA	NA	NA
SOX17	0.0361702	NA	NA	NA	NA	NA
MYBL1	NA	NA	0.0351759	NA	NA	NA
GPR124	NA	0.0346535	NA	NA	NA	NA
AXIN2	0.0340426	NA	NA	NA	NA	NA
WRN	NA	NA	0.0335008	NA	NA	NA
TLR4	NA	NA	0.0321716	NA	NA	NA
PTPRT	0.0319149	NA	NA	NA	NA	NA
GLI2	NA	NA	0.0301508	NA	NA	NA
IL10	0.0297872	NA	NA	NA	NA	NA
GID4	NA	0.029703	NA	NA	NA	NA
PRSS8	NA	0.029703	NA	NA	NA	NA
DEPDC5	NA	NA	0.0294906	NA	NA	NA
CIITA	NA	NA	0.0284757	NA	NA	NA
ZBTB2	NA	0.0280374	NA	NA	NA	NA
SLITRK6	NA	NA	0.0268097	NA	NA	NA
ANKRD11	0.0254902	NA	NA	NA	NA	NA
FYN	0.0235294	NA	NA	NA	NA	NA
NCOA3	0.0235294	NA	NA	NA	NA	NA
GLI3	NA	NA	0.0234506	NA	NA	NA
CDKN2Ap14ARF	0.0234043	NA	NA	NA	NA	NA
CDKN2Ap16INK4A	0.0234043	NA	NA	NA	NA	NA
MGA	0.0215686	NA	NA	NA	NA	NA
PLK2	0.0202128	NA	NA	NA	NA	NA
CUX1	NA	NA	0.0201005	NA	NA	NA
PRF1	NA	NA	0.0201005	NA	NA	NA
CTNNA1	NA	0.019802	NA	NA	NA	NA
PAK3	NA	0.019802	NA	NA	NA	NA
HIST3H3	0.0196078	NA	NA	NA	NA	NA
RIT1	0.0191489	NA	NA	NA	NA	NA
ACVR1B	NA	0.0186916	NA	NA	NA	NA
FRS2	NA	0.0186916	NA	NA	NA	NA
GABRA6	NA	0.0186916	NA	NA	NA	NA
IRF2	NA	0.0186916	NA	NA	NA	NA
LZTR1	NA	0.0186916	NA	NA	NA	NA
TAF1	NA	0.0186916	NA	NA	NA	NA
SETBP1	NA	NA	0.0184255	NA	NA	NA
KDM6B	NA	NA	0.0184255	NA	NA	NA
LATS1	0.0180851	NA	NA	NA	NA	NA
TET1	0.0180851	NA	NA	NA	NA	NA
BIRC3	0.0176471	NA	NA	NA	NA	NA
PGR	0.0176471	NA	NA	NA	NA	NA
ARID5B	0.0170213	NA	NA	NA	NA	NA
CRTC2	NA	NA	0.0167504	NA	NA	NA
EXT2	NA	NA	0.0167504	NA	NA	NA
RBL2	NA	NA	0.0167504	NA	NA	NA
SMC3	NA	NA	0.0167504	NA	NA	NA
STAG1	NA	NA	0.0167504	NA	NA	NA
TP63	0.0159574	NA	NA	NA	NA	NA
GPS2	0.0156863	NA	NA	NA	NA	NA
MAPK3	0.0156863	NA	NA	NA	NA	NA
BUB1B	NA	NA	0.0150754	NA	NA	NA
STAT6	NA	NA	0.0150754	NA	NA	NA
FANCL	NA	0.0148515	NA	NA	NA	NA
FGF10	NA	0.0148515	NA	NA	NA	NA
FGF23	NA	0.0148515	NA	NA	NA	NA
KLHL6	NA	0.0148515	NA	NA	NA	NA
DNMT1	0.0138298	NA	NA	NA	NA	NA
YAP1	0.0138298	NA	NA	NA	NA	NA
BCL2L12	NA	NA	0.0134003	NA	NA	NA
NFKBIZ	NA	NA	0.0134003	NA	NA	NA
PRPF40B	NA	NA	0.0134003	NA	NA	NA
XPC	NA	NA	0.0134003	NA	NA	NA
LATS2	0.012766	NA	NA	NA	NA	NA
MDC1	0.012766	NA	NA	NA	NA	NA
RASA1	0.012766	NA	NA	NA	NA	NA
PAK7	0.012766	NA	NA	NA	NA	NA
PTPRS	0.012766	NA	NA	NA	NA	NA
YES1	0.012766	NA	NA	NA	NA	NA
EIF4A2	0.0117647	NA	NA	NA	NA	NA
CBLB	NA	NA	0.0117253	NA	NA	NA
TCF7L1	NA	NA	0.0117253	NA	NA	NA
ZNF708	NA	NA	0.0117253	NA	NA	NA
HIST1H3B	0.0117021	NA	NA	NA	NA	NA
VTCN1	0.0117021	NA	NA	NA	NA	NA
RHOA	0.0106383	NA	NA	NA	NA	NA
ABCA5	NA	0.0105263	NA	NA	NA	NA
ABLIM2	NA	0.0105263	NA	NA	NA	NA
ASIC2	NA	0.0105263	NA	NA	NA	NA
C17orf99	NA	0.0105263	NA	NA	NA	NA
CCDC144NL	NA	0.0105263	NA	NA	NA	NA
CIRBP	NA	0.0105263	NA	NA	NA	NA
GNG12	NA	0.0105263	NA	NA	NA	NA
HSPA4	NA	0.0105263	NA	NA	NA	NA
KCNB1	NA	0.0105263	NA	NA	NA	NA
LOC646762	NA	0.0105263	NA	NA	NA	NA
PLXNA2	NA	0.0105263	NA	NA	NA	NA
PRRC2C	NA	0.0105263	NA	NA	NA	NA
SCAF11	NA	0.0105263	NA	NA	NA	NA
TOX	NA	0.0105263	NA	NA	NA	NA
GSTM5	NA	NA	0.0100503	NA	NA	NA
PRKCZ	NA	NA	0.0100503	NA	NA	NA
RHPN2	NA	NA	0.0100503	NA	NA	NA
FUS	NA	NA	0.0100503	NA	NA	NA
MECOM	NA	NA	0.0100503	NA	NA	NA
SF1	NA	NA	0.0100503	NA	NA	NA
SMC1A	NA	NA	0.0100503	NA	NA	NA
FGF14	NA	0.00990099	NA	NA	NA	NA
C11orf30	NA	0.00990099	NA	NA	NA	NA
FGF6	NA	0.00990099	NA	NA	NA	NA
WISP3	NA	0.00990099	NA	NA	NA	NA
THRA	NA	0.00990099	NA	NA	NA	NA
CXCR4	0.00980392	NA	NA	NA	NA	NA
FOXO1	0.00980392	NA	NA	NA	NA	NA
H3F3B	0.00980392	NA	NA	NA	NA	NA
MALT1	0.00980392	NA	NA	NA	NA	NA
IRS1	0.00957447	NA	NA	NA	NA	NA
KLF4	0.00957447	NA	NA	NA	NA	NA
INPP4A	0.00957447	NA	NA	NA	NA	NA
KEL	NA	0.00934579	NA	NA	NA	NA
RP11-435O5.4	NA	0.00934579	NA	NA	NA	NA
ACACA	NA	0.00934579	NA	NA	NA	NA
ACACB	NA	0.00934579	NA	NA	NA	NA
AHI1	NA	0.00934579	NA	NA	NA	NA
ATAD1	NA	0.00934579	NA	NA	NA	NA
CACHD1	NA	0.00934579	NA	NA	NA	NA
CACNA2D1	NA	0.00934579	NA	NA	NA	NA
CARMIL1	NA	0.00934579	NA	NA	NA	NA
CASC3	NA	0.00934579	NA	NA	NA	NA
CCDC77	NA	0.00934579	NA	NA	NA	NA
CDHR2	NA	0.00934579	NA	NA	NA	NA
FBXL20	NA	0.00934579	NA	NA	NA	NA
FTL	NA	0.00934579	NA	NA	NA	NA
GALNT11	NA	0.00934579	NA	NA	NA	NA
GPR37	NA	0.00934579	NA	NA	NA	NA
HEXIM2	NA	0.00934579	NA	NA	NA	NA
LINC00589	NA	0.00934579	NA	NA	NA	NA
LOC339166	NA	0.00934579	NA	NA	NA	NA
LPCAT1	NA	0.00934579	NA	NA	NA	NA
NBPF9	NA	0.00934579	NA	NA	NA	NA
RDM1	NA	0.00934579	NA	NA	NA	NA
RYR3	NA	0.00934579	NA	NA	NA	NA
SEC22B	NA	0.00934579	NA	NA	NA	NA
TBL1XR1	NA	0.00934579	NA	NA	NA	NA
H3F3C	0.00851064	NA	NA	NA	NA	NA
HIST1H1C	0.00851064	NA	NA	NA	NA	NA
ICOSLG	0.00851064	NA	NA	NA	NA	NA
MYOD1	0.00851064	NA	NA	NA	NA	NA
PIK3CD	0.00851064	NA	NA	NA	NA	NA
DNMT3B	0.00851064	NA	NA	NA	NA	NA
EPCAM	0.00851064	NA	NA	NA	NA	NA
IFNGR1	0.00851064	NA	NA	NA	NA	NA
RPS6KA4	0.00851064	NA	NA	NA	NA	NA
CDK9	NA	NA	0.00837521	NA	NA	NA
CRTC1	NA	NA	0.00837521	NA	NA	NA
PRAME	NA	NA	0.00837521	NA	NA	NA
SBDS	NA	NA	0.00837521	NA	NA	NA
CADM2	NA	NA	0.0080429	NA	NA	NA
KCNIP1	NA	NA	0.0080429	NA	NA	NA
NPRL2	NA	NA	0.0080429	NA	NA	NA
DNAJB1	0.00784314	NA	NA	NA	NA	NA
HIST1H3F	0.00784314	NA	NA	NA	NA	NA
EIF1AX	0.00744681	NA	NA	NA	NA	NA
PIK3R3	0.00744681	NA	NA	NA	NA	NA
ASXL2	0.00744681	NA	NA	NA	NA	NA
MAX	0.00744681	NA	NA	NA	NA	NA
TRAF7	0.00744681	NA	NA	NA	NA	NA
FKBP9	NA	NA	0.00670017	NA	NA	NA
PRPF8	NA	NA	0.00670017	NA	NA	NA
XPA	NA	NA	0.00670017	NA	NA	NA
DDB2	NA	NA	0.00670017	NA	NA	NA
CD276	0.00638298	NA	NA	NA	NA	NA
HIST2H3D	0.00588235	NA	NA	NA	NA	NA
INHA	0.00588235	NA	NA	NA	NA	NA
PPP6C	0.00588235	NA	NA	NA	NA	NA
STAT5A	0.00588235	NA	NA	NA	NA	NA
STAT5B	0.00588235	NA	NA	NA	NA	NA
HIST2H3C	0.00588235	NA	NA	NA	NA	NA
INSIG1	NA	NA	0.00536193	NA	NA	NA
NPRL3	NA	NA	0.00536193	NA	NA	NA
SQSTM1	NA	NA	0.00536193	NA	NA	NA
BBC3	0.00531915	NA	NA	NA	NA	NA
NKX3-1	0.00531915	NA	NA	NA	NA	NA
SH2D1A	0.00531915	NA	NA	NA	NA	NA
CDK5	NA	NA	0.00502513	NA	NA	NA
PHF6	NA	NA	0.00502513	NA	NA	NA
PSMD13	NA	NA	0.00502513	NA	NA	NA
PDK1	NA	0.0049505	NA	NA	NA	NA
SOX10	NA	0.0049505	NA	NA	NA	NA
STAT4	NA	0.0049505	NA	NA	NA	NA
DHX35	0.00465116	NA	NA	NA	NA	NA
E2F3	0.00425532	NA	NA	NA	NA	NA
EGFL7	0.00425532	NA	NA	NA	NA	NA
HIST1H2BD	0.00425532	NA	NA	NA	NA	NA
PDCD1	0.00425532	NA	NA	NA	NA	NA
RYBP	0.00425532	NA	NA	NA	NA	NA
SHQ1	0.00425532	NA	NA	NA	NA	NA
KMT2B	0.00425532	NA	NA	NA	NA	NA
HIST1H3A	0.00392157	NA	NA	NA	NA	NA
HIST1H3E	0.00392157	NA	NA	NA	NA	NA
HIST1H3H	0.00392157	NA	NA	NA	NA	NA
HIST1H3I	0.00392157	NA	NA	NA	NA	NA
MST1	0.00392157	NA	NA	NA	NA	NA
TRAF2	0.00392157	NA	NA	NA	NA	NA
SBNO2	0.00392157	NA	NA	NA	NA	NA
CD58	NA	NA	0.00335008	NA	NA	NA
CDK2	NA	NA	0.00335008	NA	NA	NA
GPC3	NA	NA	0.00335008	NA	NA	NA
TGFBR1	0.00319149	NA	NA	NA	NA	NA
CTLA4	0.00319149	NA	NA	NA	NA	NA
PMAIP1	0.00319149	NA	NA	NA	NA	NA
STK40	0.00319149	NA	NA	NA	NA	NA
GNB2L1	NA	NA	0.00268097	NA	NA	NA
INSRR	NA	NA	0.00268097	NA	NA	NA
KCNK12	NA	NA	0.00268097	NA	NA	NA
SDCCAG8	NA	NA	0.00268097	NA	NA	NA
RACK1	NA	NA	0.00268097	NA	NA	NA
ACBD6	0.00232558	NA	NA	NA	NA	NA
ACTN4	0.00232558	NA	NA	NA	NA	NA
C1orf87	0.00232558	NA	NA	NA	NA	NA
DDX11L2	0.00232558	NA	NA	NA	NA	NA
DIP2B	0.00232558	NA	NA	NA	NA	NA
DNAAF5	0.00232558	NA	NA	NA	NA	NA
ERMP1	0.00232558	NA	NA	NA	NA	NA
HDAC7	0.00232558	NA	NA	NA	NA	NA
MIR1281	0.00232558	NA	NA	NA	NA	NA
NFASC	0.00232558	NA	NA	NA	NA	NA
RIPK4	0.00232558	NA	NA	NA	NA	NA
SORBS2	0.00232558	NA	NA	NA	NA	NA
TGFB2	0.00232558	NA	NA	NA	NA	NA
WFDC3	0.00232558	NA	NA	NA	NA	NA
XCR1	0.00232558	NA	NA	NA	NA	NA
ZFP90	0.00232558	NA	NA	NA	NA	NA
DCUN1D1	0.00212766	NA	NA	NA	NA	NA
XIAP	0.00212766	NA	NA	NA	NA	NA
ACVR1	0.00196078	NA	NA	NA	NA	NA
BCL10	0.00196078	NA	NA	NA	NA	NA
CALR	0.00196078	NA	NA	NA	NA	NA
CENPA	0.00196078	NA	NA	NA	NA	NA
HIST1H3D	0.00196078	NA	NA	NA	NA	NA
HIST1H3G	0.00196078	NA	NA	NA	NA	NA
HIST1H3J	0.00196078	NA	NA	NA	NA	NA
RAB35	0.00196078	NA	NA	NA	NA	NA
TYK2	0.00196078	NA	NA	NA	NA	NA
ABCA12	0.00196078	NA	NA	NA	NA	NA
ABCA8	0.00196078	NA	NA	NA	NA	NA
ABCF3	0.00196078	NA	NA	NA	NA	NA
ACER1	0.00196078	NA	NA	NA	NA	NA
ADCY9	0.00196078	NA	NA	NA	NA	NA
AGBL1	0.00196078	NA	NA	NA	NA	NA
AGK	0.00196078	NA	NA	NA	NA	NA
AKAP8	0.00196078	NA	NA	NA	NA	NA
ALOX5AP	0.00196078	NA	NA	NA	NA	NA
AP1M2	0.00196078	NA	NA	NA	NA	NA
APPBP2	0.00196078	NA	NA	NA	NA	NA
ARHGAP45	0.00196078	NA	NA	NA	NA	NA
BET1	0.00196078	NA	NA	NA	NA	NA
BTC	0.00196078	NA	NA	NA	NA	NA
C19orf38	0.00196078	NA	NA	NA	NA	NA
C6orf10	0.00196078	NA	NA	NA	NA	NA
CAPZA3	0.00196078	NA	NA	NA	NA	NA
CUL5	0.00196078	NA	NA	NA	NA	NA
DDX4	0.00196078	NA	NA	NA	NA	NA
DPP6	0.00196078	NA	NA	NA	NA	NA
FZD10	0.00196078	NA	NA	NA	NA	NA
GLYATL1	0.00196078	NA	NA	NA	NA	NA
HELZ	0.00196078	NA	NA	NA	NA	NA
HIST1H2BC	0.00196078	NA	NA	NA	NA	NA
HIST1H4B	0.00196078	NA	NA	NA	NA	NA
IGSF8	0.00196078	NA	NA	NA	NA	NA
INCENP	0.00196078	NA	NA	NA	NA	NA
KIAA1024	0.00196078	NA	NA	NA	NA	NA
KLHL13	0.00196078	NA	NA	NA	NA	NA
LRRC4C	0.00196078	NA	NA	NA	NA	NA
MIR101-1	0.00196078	NA	NA	NA	NA	NA
NOVA1	0.00196078	NA	NA	NA	NA	NA
NPTX1	0.00196078	NA	NA	NA	NA	NA
NUB1	0.00196078	NA	NA	NA	NA	NA
OR13H1	0.00196078	NA	NA	NA	NA	NA
OSBPL9	0.00196078	NA	NA	NA	NA	NA
PAX8	0.00196078	NA	NA	NA	NA	NA
PDE1C	0.00196078	NA	NA	NA	NA	NA
PITPNC1	0.00196078	NA	NA	NA	NA	NA
PLEKHO2	0.00196078	NA	NA	NA	NA	NA
PODNL1	0.00196078	NA	NA	NA	NA	NA
PTRH2	0.00196078	NA	NA	NA	NA	NA
RASL10A	0.00196078	NA	NA	NA	NA	NA
RGS9	0.00196078	NA	NA	NA	NA	NA
RNFT1	0.00196078	NA	NA	NA	NA	NA
SEMA4B	0.00196078	NA	NA	NA	NA	NA
SLC13A3	0.00196078	NA	NA	NA	NA	NA
SLC5A2	0.00196078	NA	NA	NA	NA	NA
SRSF6	0.00196078	NA	NA	NA	NA	NA
ST7	0.00196078	NA	NA	NA	NA	NA
TRIM8	0.00196078	NA	NA	NA	NA	NA
UNC5D	0.00196078	NA	NA	NA	NA	NA
USP2	0.00196078	NA	NA	NA	NA	NA
WDTC1	0.00196078	NA	NA	NA	NA	NA
XKR4	0.00196078	NA	NA	NA	NA	NA
ZFP64	0.00196078	NA	NA	NA	NA	NA
ZNF525	0.00196078	NA	NA	NA	NA	NA
ZNF697	0.00196078	NA	NA	NA	NA	NA
CDK1	NA	NA	0.00167504	NA	NA	NA
RPL26	NA	NA	0.00167504	NA	NA	NA
LMO2	NA	NA	0.00167504	NA	NA	NA
LMO3	NA	NA	0.00167504	NA	NA	NA
PDPK1	0.00106383	NA	NA	NA	NA	NA
TMEM127	0.00106383	NA	NA	NA	NA	NA
BCL2L11	0.00106383	NA	NA	NA	NA	NA

## Sheet: Colorectal Cancer
	MSK	VICC	DFCI	JHU	UHN	NKI	MDA
TP53	0.736999	0.712963	0.652956	0.566265	0.632124	0.703704	0.574257
APC	0.741456	0.796296	0.760925	0.385542	0.42487	0.635802	0.257426
KRAS	0.453195	0.490741	0.475578	0.439759	0.471503	0.45679	0.554455
PIK3CA	0.203566	0.12963	0.215938	0.186747	0.186528	0.148148	0.153465
SMAD4	0.182764	0.203704	0.172237	0.0843373	0.0932642	0.0864198	0.0990099
BRAF	0.114413	0.12037	0.133676	0.108434	0.0777202	0.141975	0.0544554
FBXW7	0.111441	0.0925926	0.128535	0.0813253	0.0777202	0.0925926	0.039604
GNAS	0.0624071	0.268519	0.0719794	0.00903614	0.0207254	0.0185185	0.00990099
ATM	0.0653789	0.0833333	0.138817	0.0271084	0.0310881	0.0246914	0.0049505
PTEN	0.0742942	0.0740741	0.0848329	0.0361446	0.0414508	0.0185185	0.0049505
NRAS	0.0445765	0.0185185	0.0514139	0.0451807	0.0362694	0.0617284	0.049505
RB1	0.0312036	0.12037	0.0411311	0.0120482	0.0725389	0.00617284	0.0049505
ERBB4	0.0534918	0.0740741	0.0951157	0.0180723	0.0259067	0	0.0148515
ERBB2	0.0653789	0.0555556	0.0719794	0.0060241	0.0259067	0.0123457	0.0148515
CTNNB1	0.0653789	0.0648148	0.066838	0.0271084	0.0103627	0.00617284	0.00990099
NOTCH1	0.0579495	0.0925926	0.0848329	0.00903614	0	0	0.0049505
SRC	0.0520059	0.166667	0.0257069	0.00301205	0	0	0
FLT3	0.0728083	0.111111	0.0565553	0.00301205	0	0	0
EGFR	0.0401189	0.0925926	0.0462725	0.0180723	0.015544	0	0
ALK	0.0416048	0.0925926	0.0642674	0.0060241	0	0	0.0049505
CDKN2A	0.0267459	0.0462963	0.0257069	0.0240964	0.0673575	0	0
SMO	0.0208024	0.0740741	0.0539846	0.00903614	0.0207254	0.00617284	0
KDR	0.0326895	0.0277778	0.0642674	0.0240964	0	0.0123457	0.0049505
FGFR3	0.0297177	0.00925926	0.0411311	0.0210843	0.0310881	0	0.00990099
RET	0.02526	0.0462963	0.0437018	0.00301205	0.0103627	0	0.0049505
MET	0.0297177	0.0277778	0.0437018	0.0180723	0.00518135	0	0.0049505
PDGFRA	0.0371471	0.0277778	0.0385604	0.00301205	0.0103627	0.00617284	0.0049505
CSF1R	0.0267459	0.0277778	0.0509259	0	0	0.00617284	0
FGFR1	0.0490342	0.0277778	0.0282776	0.0060241	0	0	0
KIT	0.02526	0.0277778	0.0257069	0.0210843	0.0103627	0	0
CDH1	0.0208024	0.00925926	0.0437018	0.0150602	0	0.00617284	0.00990099
JAK3	0.0178306	0.0277778	0.0565553	0	0	0	0
HNF1A	0.02526	0.0327869	0.0205656	0.00301205	0.00518135	0.00617284	0
FGFR2	0.0282318	0.0185185	0.0308483	0.00903614	0	0	0.0049505
MLH1	0.0148588	0.0277778	0.0488432	0	0	0	0
ABL1	0.0193165	0	0.0359897	0.00301205	0.0103627	0.00617284	0.0049505
AKT1	0.0163447	0.00925926	0.0179949	0.0180723	0.0103627	0.00617284	0
STK11	0.0089153	0.0277778	0.0102828	0.0240964	0	0.00617284	0
IDH1	0.0163447	0.0185185	0.0231362	0.00301205	0.0103627	0	0
PTPN11	0.013373	0.00925926	0.0205656	0.0210843	0	0	0
MPL	0.013373	0.0185185	0.0231362	0.00903614	0	0	0
JAK2	0.013373	0.0185185	0.0282776	0.00301205	0	0	0
SMARCB1	0.0222883	0	0.0154242	0.0120482	0	0.00617284	0.0049505
HRAS	0.00594354	0	0.00514139	0.0150602	0.0103627	0	0.0049505
VHL	0.00445765	0	0.00257069	0	0.0207254	0.00617284	0
NPM1	0.00148588	0.00925926	0.0128535	0.00301205	0	0	0
GNA11	0.0118871	0.0185185	0.0154242	0.00301205	0.0466321	0.00617284	NA
GNAQ	0.0089153	0	0.00771208	0.00301205	0	0	NA
EZH2	0.00594354	0.0185185	0.0128535	0	NA	NA	NA
IDH2	0.0089153	0.0185185	0.00771208	0	NA	NA	NA
KMT2D	0.0846954	0.175926	0.1491	NA	NA	NA	NA
SOX9	0.0965825	0.180328	0.120823	NA	NA	NA	NA
ASXL1	0.0802377	0.231481	0.066838	NA	NA	NA	NA
BRCA2	0.0698366	0.185185	0.118252	NA	NA	NA	NA
ARID1B	0.0505201	0.180328	0.113111	NA	NA	NA	NA
BCL2L1	0.0564636	0.262295	0.00514139	NA	NA	NA	NA
FLT1	0.0683507	0.12037	0.0796915	NA	NA	NA	NA
ARID1A	0.0668648	0.0833333	0.107969	NA	NA	NA	NA
AURKA	0.0341753	0.194444	0.0154242	NA	NA	NA	NA
MYC	0.0564636	0.12037	0.0488432	NA	NA	NA	NA
KMT2A	0.0505201	0.0833333	0.059126	NA	NA	NA	NA
EP300	0.0520059	0.0740741	0.066838	NA	NA	NA	NA
CREBBP	0.0490342	0.0555556	0.0848329	NA	NA	NA	NA
EPHA3	0.038633	0.0925926	0.0514139	NA	NA	NA	NA
ARID2	0.0534918	0.0462963	0.0796915	NA	NA	NA	NA
ATRX	0.0430906	0.0740741	0.059126	NA	NA	NA	NA
SMAD2	0.063893	0.0648148	0.0385604	NA	NA	NA	NA
SMARCA4	0.063893	0.0555556	0.0385604	NA	NA	NA	NA
PTCH1	0.0416048	0.0648148	0.0514139	NA	NA	NA	NA
EPHA5	0.0564636	0.0185185	0.0822622	NA	NA	NA	NA
SETD2	0.0416048	0.0277778	0.0848329	NA	NA	NA	NA
MTOR	0.0460624	0.0462963	0.0565553	NA	NA	NA	NA
ERBB3	0.0401189	0.0462963	0.0616967	NA	NA	NA	NA
CARD11	0.0490342	0.037037	0.0616967	NA	NA	NA	NA
NTRK3	0.0237741	0.0648148	0.0539846	NA	NA	NA	NA
EPHA7	0.0285088	0.0655738	0.0437018	NA	NA	NA	NA
NF1	0.0490342	0.037037	0.0514139	NA	NA	NA	NA
BCOR	0.0356612	0.0555556	0.0437018	NA	NA	NA	NA
MAP2K4	0.02526	0.0648148	0.0437018	NA	NA	NA	NA
PDGFRB	0.0222883	0.0462963	0.0642674	NA	NA	NA	NA
PIK3R1	0.0430906	0.037037	0.0514139	NA	NA	NA	NA
BRCA1	0.0312036	0.0555556	0.0411311	NA	NA	NA	NA
IKZF1	0.0371471	0.0648148	0.0257069	NA	NA	NA	NA
FLT4	0.0430906	0.037037	0.0437018	NA	NA	NA	NA
TSC2	0.0341753	0.0277778	0.0616967	NA	NA	NA	NA
GLI1	0.0416667	0.0327869	0.0462725	NA	NA	NA	NA
MSH6	0.0371471	0.0277778	0.0514139	NA	NA	NA	NA
PBRM1	0.0371471	0.0277778	0.0509259	NA	NA	NA	NA
MSH2	0.0267459	0.037037	0.0514139	NA	NA	NA	NA
ROS1	0.0416048	0	0.0719794	NA	NA	NA	NA
BLM	0.0193165	0.0555556	0.0359897	NA	NA	NA	NA
TET2	0.0312036	0.0277778	0.0514139	NA	NA	NA	NA
TERT	0.02526	0.0327869	0.0514139	NA	NA	NA	NA
IGF1R	0.02526	0.037037	0.0462725	NA	NA	NA	NA
FANCA	0.0282318	0.0462963	0.0308483	NA	NA	NA	NA
NTRK1	0.0356612	0.0462963	0.0231362	NA	NA	NA	NA
DDR2	0.0118871	0.0555556	0.0359897	NA	NA	NA	NA
CBL	0.0089153	0.0462963	0.0437018	NA	NA	NA	NA
FLCN	0.0282318	0.0327869	0.0359897	NA	NA	NA	NA
PTPRD	0.0401189	0	0.0555556	NA	NA	NA	NA
AXL	0.0312036	0.0277778	0.0359897	NA	NA	NA	NA
AR	0.0445765	0.00925926	0.0385604	NA	NA	NA	NA
NOTCH2	0.0297177	0.0185185	0.0437018	NA	NA	NA	NA
DIS3	0.0475483	0	0.0385604	NA	NA	NA	NA
PALB2	0.0237741	0.0185185	0.0437018	NA	NA	NA	NA
PARK2	0.0222883	0.0327869	0.0308483	NA	NA	NA	NA
MAP3K1	0.0445765	0	0.0411311	NA	NA	NA	NA
ESR1	0.0356612	0.0185185	0.0308483	NA	NA	NA	NA
BRIP1	0.0163447	0.037037	0.0308483	NA	NA	NA	NA
DICER1	0.0282318	0	0.0539846	NA	NA	NA	NA
FGFR4	0.0148588	0.0277778	0.0359897	NA	NA	NA	NA
KDM6A	0.0222883	0.0185185	0.0359897	NA	NA	NA	NA
CDKN1B	0.0222883	0.037037	0.0154242	NA	NA	NA	NA
SF3B1	0.02526	0.0277778	0.0205656	NA	NA	NA	NA
MITF	0.02526	0.0185185	0.0282776	NA	NA	NA	NA
CDKN2B	0.0208024	0.037037	0.0102828	NA	NA	NA	NA
CCND2	0.0356612	0.0185185	0.0128535	NA	NA	NA	NA
CDC73	0.0148588	0.0185185	0.033419	NA	NA	NA	NA
TSC1	0.02526	0.00925926	0.0308483	NA	NA	NA	NA
SH2B3	0.0241228	0	0.0411311	NA	NA	NA	NA
BRD4	0.02526	0.0163934	0.0231362	NA	NA	NA	NA
ERCC4	0.0208024	0	0.0437018	NA	NA	NA	NA
SUFU	0.00594354	0.037037	0.0205656	NA	NA	NA	NA
KDM5C	0.02526	0	0.037037	NA	NA	NA	NA
STAG2	0.0222883	0.00925926	0.0282776	NA	NA	NA	NA
XPO1	0.0089153	0.0185185	0.0308483	NA	NA	NA	NA
ERCC2	0.0193165	0	0.0385604	NA	NA	NA	NA
U2AF1	0.0118871	0.0327869	0.0128535	NA	NA	NA	NA
MEF2B	0.0193165	0.0277778	0.0102828	NA	NA	NA	NA
RUNX1	0.0178306	0.0185185	0.0205656	NA	NA	NA	NA
GATA3	0.0222883	0.0185185	0.0154242	NA	NA	NA	NA
AKT3	0.0237741	0.00925926	0.0231362	NA	NA	NA	NA
NKX2-1	0.013373	0.0185185	0.0231362	NA	NA	NA	NA
TNFAIP3	0.013373	0.0185185	0.0231362	NA	NA	NA	NA
SDHA	0.0104012	0.0163934	0.0277778	NA	NA	NA	NA
PRDM1	0.0193165	0.00925926	0.0257069	NA	NA	NA	NA
RARA	0.0163447	0.00925926	0.0282776	NA	NA	NA	NA
BCL6	0.0118871	0.0185185	0.0231362	NA	NA	NA	NA
FANCC	0.013373	0.00925926	0.0308483	NA	NA	NA	NA
NTRK2	0.0193165	0.0185185	0.0154242	NA	NA	NA	NA
CHEK2	0.00742942	0.00925926	0.0359897	NA	NA	NA	NA
CD274	0.00594354	0.0327869	0.0128535	NA	NA	NA	NA
PMS2	0.0148588	0	0.0359897	NA	NA	NA	NA
ETV6	0.0297177	0	0.0205656	NA	NA	NA	NA
ETV1	0.0267459	0	0.0231362	NA	NA	NA	NA
PRKAR1A	0.00594354	0.0277778	0.0154242	NA	NA	NA	NA
NBN	0.0208024	0	0.0282776	NA	NA	NA	NA
KEAP1	0.0163447	0.0185185	0.0138889	NA	NA	NA	NA
MCL1	0.0089153	0.0185185	0.0205656	NA	NA	NA	NA
ALOX12B	0.0118871	0	0.0359897	NA	NA	NA	NA
DNMT3A	0.0193165	0	0.0282776	NA	NA	NA	NA
SOX2	0.013373	0.0185185	0.0154242	NA	NA	NA	NA
CCNE1	0.0104012	0.0185185	0.0154242	NA	NA	NA	NA
BAP1	0.0163447	0.00925926	0.0179949	NA	NA	NA	NA
CCND3	0.00742942	0.0277778	0.00771208	NA	NA	NA	NA
ARAF	0.0193165	0	0.0231362	NA	NA	NA	NA
RAF1	0.0193165	0	0.0231362	NA	NA	NA	NA
STAT3	0.0131579	0.0163934	0.0128535	NA	NA	NA	NA
BMPR1A	0.0163447	0	0.0231362	NA	NA	NA	NA
PAX5	0.0193165	0.00925926	0.0102828	NA	NA	NA	NA
MYCL	0.00742942	0.0185185	0.0128535	NA	NA	NA	NA
FAM46C	0.013373	0.00925926	0.0154242	NA	NA	NA	NA
CCND1	0.0118871	0	0.0257069	NA	NA	NA	NA
MUTYH	0.0148588	0.00925926	0.0128535	NA	NA	NA	NA
AKT2	0.0178306	0.00925926	0.00771208	NA	NA	NA	NA
SYK	0.013373	0	0.0205656	NA	NA	NA	NA
FH	0.0104012	0	0.0231362	NA	NA	NA	NA
SDHD	0.00445765	0.0163934	0.0102828	NA	NA	NA	NA
MYD88	0.0104012	0.00925926	0.0102828	NA	NA	NA	NA
NFE2L2	0.0104012	0	0.0179949	NA	NA	NA	NA
CDK4	0.00594354	0.00925926	0.0128535	NA	NA	NA	NA
MYCN	0.013373	0	0.0128535	NA	NA	NA	NA
MEN1	0.0104012	0	0.0154242	NA	NA	NA	NA
MAP2K1	0.0163447	0.00925926	0	NA	NA	NA	NA
NF2	0.0148588	0	0.0102828	NA	NA	NA	NA
CD79B	0.00297177	0.00925926	0.0128535	NA	NA	NA	NA
CDK6	0.0104012	0.00925926	0.00514139	NA	NA	NA	NA
WT1	0.0089153	0	0.0154242	NA	NA	NA	NA
SDHB	0.00148588	0.0163934	0.00514139	NA	NA	NA	NA
MDM2	0.00445765	0	0.0179949	NA	NA	NA	NA
REL	0.00445765	0	0.0179949	NA	NA	NA	NA
CRLF2	0.0104012	0.00925926	0.00257069	NA	NA	NA	NA
BCL2	0.0118871	0	0.0102828	NA	NA	NA	NA
CEBPA	0.00657895	0	0.0128535	NA	NA	NA	NA
AURKB	0.0089153	0	0.00771208	NA	NA	NA	NA
SDHC	0.00297177	0	0.0128535	NA	NA	NA	NA
H3F3A	0.00438596	0	0.0102828	NA	NA	NA	NA
PNRC1	0.00148588	0	0.0128535	NA	NA	NA	NA
CDKN2C	0.00594354	0	0.00771208	NA	NA	NA	NA
CDKN1A	0.00297177	0	0.0102828	NA	NA	NA	NA
CRKL	0.00742942	0	0.00514139	NA	NA	NA	NA
NFKBIA	0.00657895	0	0.00514139	NA	NA	NA	NA
LMO1	0.00742942	0	0.00257069	NA	NA	NA	NA
SOCS1	0.00445765	0	0.00514139	NA	NA	NA	NA
MDM4	0.00445765	0	0.00257069	NA	NA	NA	NA
ZNF217	NA	0.231481	0.0359897	NA	NA	NA	NA
TCF7L2	0.14693	NA	0.115681	NA	NA	NA	NA
KMT2C	0.0534918	0.180328	NA	NA	NA	NA	NA
TOP1	0.0430906	0.175926	NA	NA	NA	NA	NA
PRKDC	NA	0.0925926	0.107969	NA	NA	NA	NA
IRS2	0.0401189	0.12037	NA	NA	NA	NA	NA
RNF43	0.0846954	0.0648148	NA	NA	NA	NA	NA
CDK8	0.0460624	0.0925926	NA	NA	NA	NA	NA
PLCG2	0.0394737	0.0819672	NA	NA	NA	NA	NA
AMER1	0.0564636	0.0648148	NA	NA	NA	NA	NA
RECQL4	0.0579495	NA	0.0601852	NA	NA	NA	NA
POLE	0.0505201	0.0655738	NA	NA	NA	NA	NA
FAT1	0.0757801	0.0327869	NA	NA	NA	NA	NA
SPEN	0.0430906	0.0648148	NA	NA	NA	NA	NA
SMAD3	0.0534918	0.0491803	NA	NA	NA	NA	NA
NOTCH3	0.0728083	0.0277778	NA	NA	NA	NA	NA
GRIN2A	0.0534918	0.0462963	NA	NA	NA	NA	NA
KDM5A	0.0549777	0.037037	NA	NA	NA	NA	NA
CIC	0.0430906	0.0462963	NA	NA	NA	NA	NA
TGFBR2	0.0460624	0.037037	NA	NA	NA	NA	NA
PIK3CG	0.0356612	0.0462963	NA	NA	NA	NA	NA
ERCC5	0.0297177	NA	0.0514139	NA	NA	NA	NA
BARD1	0.0148588	0.0648148	NA	NA	NA	NA	NA
RPTOR	0.0237741	0.0555556	NA	NA	NA	NA	NA
PIK3C2B	NA	0.0327869	0.0462725	NA	NA	NA	NA
GATA4	NA	0.0491803	0.0282776	NA	NA	NA	NA
ATR	0.0371471	0.037037	NA	NA	NA	NA	NA
FANCE	NA	0.0648148	0.00771208	NA	NA	NA	NA
BCORL1	NA	0.0185185	0.0539846	NA	NA	NA	NA
AXIN1	0.0222883	0.0491803	NA	NA	NA	NA	NA
EPHB1	0.0312036	0.037037	NA	NA	NA	NA	NA
MED12	0.0401189	0.0277778	NA	NA	NA	NA	NA
DOT1L	0.0371471	0.0277778	NA	NA	NA	NA	NA
CDK12	0.0445765	0.0185185	NA	NA	NA	NA	NA
TCF3	0.0241228	NA	0.0385604	NA	NA	NA	NA
GATA6	NA	0.0491803	0.0128535	NA	NA	NA	NA
RAD21	0.0307018	NA	0.0308483	NA	NA	NA	NA
JUN	0.0222883	0.037037	NA	NA	NA	NA	NA
B2M	0.0282318	NA	0.0308483	NA	NA	NA	NA
RICTOR	0.0312036	0.0277778	NA	NA	NA	NA	NA
INHBA	0.0285088	0.0277778	NA	NA	NA	NA	NA
NCOR1	0.0549777	0	NA	NA	NA	NA	NA
IL7R	0.0163447	0.037037	NA	NA	NA	NA	NA
ERCC3	0.0237741	NA	0.0282776	NA	NA	NA	NA
RBM10	0.0341753	0.0163934	NA	NA	NA	NA	NA
POLD1	0.0175439	0.0327869	NA	NA	NA	NA	NA
JAK1	0.0222883	0.0277778	NA	NA	NA	NA	NA
CSF3R	0.0219298	NA	0.0277778	NA	NA	NA	NA
NSD1	0.0371471	0.00925926	NA	NA	NA	NA	NA
TSHR	0.0178306	0.0277778	NA	NA	NA	NA	NA
MRE11A	0.0237741	0.0212766	NA	NA	NA	NA	NA
FOXP1	0.0282318	0.0163934	NA	NA	NA	NA	NA
NOTCH4	0.0445765	0	NA	NA	NA	NA	NA
PMS1	0.0118871	NA	0.0308483	NA	NA	NA	NA
GATA1	0.013373	0.0277778	NA	NA	NA	NA	NA
CTCF	0.0312036	0.00925926	NA	NA	NA	NA	NA
SUZ12	0.0104012	NA	0.0282776	NA	NA	NA	NA
TBX3	0.0267459	0.00925926	NA	NA	NA	NA	NA
CYLD	NA	0	0.0359897	NA	NA	NA	NA
NEGR1	0.0219298	NA	0.0138889	NA	NA	NA	NA
MST1R	0.0350877	0	NA	NA	NA	NA	NA
FGF3	0.0163447	0.0185185	NA	NA	NA	NA	NA
RAD50	0.02526	0.00925926	NA	NA	NA	NA	NA
RFWD2	0.013373	NA	0.0205656	NA	NA	NA	NA
FOXL2	0.0148588	0.0185185	NA	NA	NA	NA	NA
IRF4	0.0237741	0.00925926	NA	NA	NA	NA	NA
RAD52	0.0312036	0	NA	NA	NA	NA	NA
PIK3R2	0.0208024	0.00925926	NA	NA	NA	NA	NA
PPP2R1A	0.0208024	0.00925926	NA	NA	NA	NA	NA
FANCG	NA	0.00925926	0.0205656	NA	NA	NA	NA
CASP8	0.0282318	0	NA	NA	NA	NA	NA
PIK3C2G	0.0282318	0	NA	NA	NA	NA	NA
QKI	NA	0	0.0277778	NA	NA	NA	NA
CBFB	0.0089153	0.0185185	NA	NA	NA	NA	NA
EED	0.0089153	NA	0.0185185	NA	NA	NA	NA
FANCD2	NA	0.00925926	0.0179949	NA	NA	NA	NA
PIK3C3	0.02526	0	NA	NA	NA	NA	NA
FANCF	NA	0.00925926	0.0154242	NA	NA	NA	NA
ETV4	NA	0	0.0231362	NA	NA	NA	NA
VEGFA	0.00438596	0.0185185	NA	NA	NA	NA	NA
RAC1	0.00594354	0.0163934	NA	NA	NA	NA	NA
PHOX2B	0.0118871	NA	0.0102828	NA	NA	NA	NA
DAXX	0.0118871	0.00925926	NA	NA	NA	NA	NA
INSR	0.0208024	0	NA	NA	NA	NA	NA
PIK3CB	0.0208024	0	NA	NA	NA	NA	NA
PDCD1LG2	NA	0	0.0205656	NA	NA	NA	NA
MAP3K13	0.0193165	0	NA	NA	NA	NA	NA
PIM1	0.00297177	NA	0.0154242	NA	NA	NA	NA
GATA2	0.0089153	0.00925926	NA	NA	NA	NA	NA
MAPK1	0.0104012	NA	0.00771208	NA	NA	NA	NA
ERRFI1	0.0175439	0	NA	NA	NA	NA	NA
HLA-A	0.0175439	0	NA	NA	NA	NA	NA
NUP93	0.0175439	0	NA	NA	NA	NA	NA
SRSF2	0.00657895	NA	0.0102828	NA	NA	NA	NA
TNFRSF14	0.00742942	0.00925926	NA	NA	NA	NA	NA
HGF	0.0163447	0	NA	NA	NA	NA	NA
RAD54L	0.0163447	0	NA	NA	NA	NA	NA
IKBKE	0.0148588	0	NA	NA	NA	NA	NA
INPP4B	0.0148588	0	NA	NA	NA	NA	NA
PARP1	0.0148588	0	NA	NA	NA	NA	NA
SPOP	0.00445765	0.00925926	NA	NA	NA	NA	NA
FUBP1	0.013373	0	NA	NA	NA	NA	NA
ERG	0.013373	0	NA	NA	NA	NA	NA
EWSR1	NA	0	0.0128535	NA	NA	NA	NA
FAS	NA	0	0.0128535	NA	NA	NA	NA
FGF4	0.0118871	0	NA	NA	NA	NA	NA
GSK3B	0.0118871	0	NA	NA	NA	NA	NA
IGF2	0.0118871	0	NA	NA	NA	NA	NA
CDKN2B-AS1	0.00219298	NA	0.00925926	NA	NA	NA	NA
ZRSR2	0.00877193	NA	0.00257069	NA	NA	NA	NA
XRCC2	0.0109649	0	NA	NA	NA	NA	NA
FGF19	0.0104012	0	NA	NA	NA	NA	NA
TMPRSS2	0.0104012	0	NA	NA	NA	NA	NA
MYB	NA	0	0.0102828	NA	NA	NA	NA
ETV5	NA	0	0.0102828	NA	NA	NA	NA
PRKCI	NA	0	0.0102828	NA	NA	NA	NA
RHEB	0.00438596	NA	0.00462963	NA	NA	NA	NA
SMARCD1	0.0089153	0	NA	NA	NA	NA	NA
CD79A	0.00877193	0	NA	NA	NA	NA	NA
SDHAF2	0.00297177	NA	0.00514139	NA	NA	NA	NA
FAM175A	0.00742942	0	NA	NA	NA	NA	NA
IGF1	0.00742942	0	NA	NA	NA	NA	NA
CHEK1	0.00742942	0	NA	NA	NA	NA	NA
GREM1	0.00742942	0	NA	NA	NA	NA	NA
ID3	0.00438596	NA	0.00257069	NA	NA	NA	NA
BTK	0.00594354	0	NA	NA	NA	NA	NA
MAP2K2	0.00594354	0	NA	NA	NA	NA	NA
RAD51C	0.00594354	0	NA	NA	NA	NA	NA
RAD51D	0.00594354	0	NA	NA	NA	NA	NA
CUL3	0.00445765	0	NA	NA	NA	NA	NA
HOXB13	0.00438596	0	NA	NA	NA	NA	NA
PAK5	0.00297177	0	NA	NA	NA	NA	NA
RAD51	0.00297177	0	NA	NA	NA	NA	NA
RAD51B	0.00297177	0	NA	NA	NA	NA	NA
LRP1B	NA	0.185185	NA	NA	NA	NA	NA
ARFRP1	NA	0.166667	NA	NA	NA	NA	NA
PREX2	NA	0.163934	NA	NA	NA	NA	NA
DMD	NA	NA	0.120823	NA	NA	NA	NA
GLI3	NA	NA	0.105398	NA	NA	NA	NA
RUNX1T1	NA	0.101852	NA	NA	NA	NA	NA
SPTA1	NA	0.0983607	NA	NA	NA	NA	NA
PTPRT	0.0921248	NA	NA	NA	NA	NA	NA
PTPRS	0.0861813	NA	NA	NA	NA	NA	NA
FGF14	NA	0.0833333	NA	NA	NA	NA	NA
KAT6A	NA	0.0740741	NA	NA	NA	NA	NA
ZNF703	NA	0.0740741	NA	NA	NA	NA	NA
ZFHX3	0.0657895	NA	NA	NA	NA	NA	NA
LYN	NA	0.0655738	NA	NA	NA	NA	NA
DNMT3B	0.0624071	NA	NA	NA	NA	NA	NA
GLI2	NA	NA	0.0616967	NA	NA	NA	NA
MGA	0.0570175	NA	NA	NA	NA	NA	NA
SETBP1	NA	NA	0.0539846	NA	NA	NA	NA
WRN	NA	NA	0.0539846	NA	NA	NA	NA
TLR4	NA	NA	0.0509259	NA	NA	NA	NA
LATS2	0.0505201	NA	NA	NA	NA	NA	NA
IRF2	NA	0.0491803	NA	NA	NA	NA	NA
SNCAIP	NA	0.0491803	NA	NA	NA	NA	NA
EXT1	NA	NA	0.0488432	NA	NA	NA	NA
CIITA	NA	NA	0.0462725	NA	NA	NA	NA
KDM6B	NA	NA	0.0462725	NA	NA	NA	NA
AXIN2	0.0445765	NA	NA	NA	NA	NA	NA
ANKRD11	0.0416667	NA	NA	NA	NA	NA	NA
NCOA3	0.0416667	NA	NA	NA	NA	NA	NA
CUX1	NA	NA	0.0411311	NA	NA	NA	NA
MECOM	NA	NA	0.0385604	NA	NA	NA	NA
PIK3CD	0.0371471	NA	NA	NA	NA	NA	NA
SOX17	0.0371471	NA	NA	NA	NA	NA	NA
FGF6	NA	0.037037	NA	NA	NA	NA	NA
RBL2	NA	NA	0.0359897	NA	NA	NA	NA
STAG1	NA	NA	0.0359897	NA	NA	NA	NA
RASA1	0.0341753	NA	NA	NA	NA	NA	NA
MYBL1	NA	NA	0.033419	NA	NA	NA	NA
PRPF40B	NA	NA	0.033419	NA	NA	NA	NA
PTK2	NA	NA	0.033419	NA	NA	NA	NA
SF1	NA	NA	0.033419	NA	NA	NA	NA
ABL2	NA	0.0327869	NA	NA	NA	NA	NA
ACVR1B	NA	0.0327869	NA	NA	NA	NA	NA
CHD4	NA	0.0327869	NA	NA	NA	NA	NA
GPR124	NA	0.0327869	NA	NA	NA	NA	NA
GRM3	NA	0.0327869	NA	NA	NA	NA	NA
HSP90AA1	NA	0.0327869	NA	NA	NA	NA	NA
LZTR1	NA	0.0327869	NA	NA	NA	NA	NA
IRS1	0.0326895	NA	NA	NA	NA	NA	NA
TET1	0.0326895	NA	NA	NA	NA	NA	NA
DEPDC5	NA	NA	0.0324074	NA	NA	NA	NA
SLITRK6	NA	NA	0.0324074	NA	NA	NA	NA
DNMT1	0.0312036	NA	NA	NA	NA	NA	NA
CBLB	NA	NA	0.0308483	NA	NA	NA	NA
NFKBIZ	NA	NA	0.0308483	NA	NA	NA	NA
PRPF8	NA	NA	0.0308483	NA	NA	NA	NA
LATS1	0.0297177	NA	NA	NA	NA	NA	NA
CRTC2	NA	NA	0.0282776	NA	NA	NA	NA
EXT2	NA	NA	0.0282776	NA	NA	NA	NA
ARID5B	0.0282318	NA	NA	NA	NA	NA	NA
CADM2	NA	NA	0.0277778	NA	NA	NA	NA
GNA13	NA	0.0277778	NA	NA	NA	NA	NA
NPRL3	NA	NA	0.0277778	NA	NA	NA	NA
PAK7	0.0263158	NA	NA	NA	NA	NA	NA
IKZF3	NA	NA	0.0257069	NA	NA	NA	NA
SMC1A	NA	NA	0.0257069	NA	NA	NA	NA
MDC1	0.02526	NA	NA	NA	NA	NA	NA
NKX3-1	0.02526	NA	NA	NA	NA	NA	NA
STAT5B	0.0241228	NA	NA	NA	NA	NA	NA
TGFBR1	0.0237741	NA	NA	NA	NA	NA	NA
YES1	0.0237741	NA	NA	NA	NA	NA	NA
FKBP9	NA	NA	0.0231362	NA	NA	NA	NA
BUB1B	NA	NA	0.0231362	NA	NA	NA	NA
SMC3	NA	NA	0.0231362	NA	NA	NA	NA
STAT6	NA	NA	0.0231362	NA	NA	NA	NA
ZNF708	NA	NA	0.0231362	NA	NA	NA	NA
RPS6KA4	0.0222883	NA	NA	NA	NA	NA	NA
ADCK2	NA	0.0212766	NA	NA	NA	NA	NA
MAD1L1	NA	0.0212766	NA	NA	NA	NA	NA
YPEL2	NA	0.0212766	NA	NA	NA	NA	NA
ZDBF2	NA	0.0212766	NA	NA	NA	NA	NA
ASXL2	0.0208024	NA	NA	NA	NA	NA	NA
CRTC1	NA	NA	0.0205656	NA	NA	NA	NA
PRKCZ	NA	NA	0.0205656	NA	NA	NA	NA
RHPN2	NA	NA	0.0205656	NA	NA	NA	NA
FOXO1	0.0197368	NA	NA	NA	NA	NA	NA
PPM1D	0.0197368	NA	NA	NA	NA	NA	NA
INPP4A	0.0193165	NA	NA	NA	NA	NA	NA
C11orf30	NA	0.0185185	NA	NA	NA	NA	NA
CTNNA1	NA	0.0185185	NA	NA	NA	NA	NA
FGF23	NA	0.0185185	NA	NA	NA	NA	NA
GID4	NA	0.0185185	NA	NA	NA	NA	NA
PRSS8	NA	0.0185185	NA	NA	NA	NA	NA
SQSTM1	NA	NA	0.0185185	NA	NA	NA	NA
STAT4	NA	0.0185185	NA	NA	NA	NA	NA
ADGRA2	NA	0.0185185	NA	NA	NA	NA	NA
PRF1	NA	NA	0.0179949	NA	NA	NA	NA
MYOD1	0.0178306	NA	NA	NA	NA	NA	NA
PGR	0.0175439	NA	NA	NA	NA	NA	NA
GABRA6	NA	0.0163934	NA	NA	NA	NA	NA
MAGI2	NA	0.0163934	NA	NA	NA	NA	NA
RANBP2	NA	0.0163934	NA	NA	NA	NA	NA
TAF1	NA	0.0163934	NA	NA	NA	NA	NA
TOP2A	NA	0.0163934	NA	NA	NA	NA	NA
ARHGAP9	NA	0.0163934	NA	NA	NA	NA	NA
DEFB118	NA	0.0163934	NA	NA	NA	NA	NA
DLGAP4	NA	0.0163934	NA	NA	NA	NA	NA
EPN2	NA	0.0163934	NA	NA	NA	NA	NA
LRRN2	NA	0.0163934	NA	NA	NA	NA	NA
LSM7	NA	0.0163934	NA	NA	NA	NA	NA
PPIL6	NA	0.0163934	NA	NA	NA	NA	NA
SLC1A1	NA	0.0163934	NA	NA	NA	NA	NA
SLC6A13	NA	0.0163934	NA	NA	NA	NA	NA
PAK1	0.0163447	NA	NA	NA	NA	NA	NA
PDCD1	0.0163447	NA	NA	NA	NA	NA	NA
TP63	0.0163447	NA	NA	NA	NA	NA	NA
CD58	NA	NA	0.0154242	NA	NA	NA	NA
DDB2	NA	NA	0.0154242	NA	NA	NA	NA
GSTM5	NA	NA	0.0154242	NA	NA	NA	NA
PRAME	NA	NA	0.0154242	NA	NA	NA	NA
PSMD13	NA	NA	0.0154242	NA	NA	NA	NA
RP4-806M20.3	NA	NA	0.0154242	NA	NA	NA	NA
XPA	NA	NA	0.0154242	NA	NA	NA	NA
MALT1	0.0153509	NA	NA	NA	NA	NA	NA
RPS6KB2	0.0148588	NA	NA	NA	NA	NA	NA
TRAF7	0.0148588	NA	NA	NA	NA	NA	NA
XIAP	0.0148588	NA	NA	NA	NA	NA	NA
INSIG1	NA	NA	0.0138889	NA	NA	NA	NA
KCNIP1	NA	NA	0.0138889	NA	NA	NA	NA
BIRC3	0.0131579	NA	NA	NA	NA	NA	NA
FUS	NA	NA	0.0128535	NA	NA	NA	NA
XPC	NA	NA	0.0128535	NA	NA	NA	NA
CDK5	NA	NA	0.0128535	NA	NA	NA	NA
TCF7L1	NA	NA	0.0128535	NA	NA	NA	NA
FOXA1	0.0118871	NA	NA	NA	NA	NA	NA
HIST1H1C	0.0118871	NA	NA	NA	NA	NA	NA
HIST1H2BD	0.0118871	NA	NA	NA	NA	NA	NA
IFNGR1	0.0118871	NA	NA	NA	NA	NA	NA
KLF4	0.0118871	NA	NA	NA	NA	NA	NA
SHQ1	0.0118871	NA	NA	NA	NA	NA	NA
CDKN2Ap14ARF	0.0118871	NA	NA	NA	NA	NA	NA
CDKN2Ap16INK4A	0.0118871	NA	NA	NA	NA	NA	NA
FYN	0.0109649	NA	NA	NA	NA	NA	NA
GPS2	0.0109649	NA	NA	NA	NA	NA	NA
INHA	0.0109649	NA	NA	NA	NA	NA	NA
MAPK3	0.0109649	NA	NA	NA	NA	NA	NA
ELOC	0.0109649	NA	NA	NA	NA	NA	NA
ICOSLG	0.0104012	NA	NA	NA	NA	NA	NA
PMAIP1	0.0104012	NA	NA	NA	NA	NA	NA
RHOA	0.0104012	NA	NA	NA	NA	NA	NA
H3F3C	0.0104012	NA	NA	NA	NA	NA	NA
PLK2	0.0104012	NA	NA	NA	NA	NA	NA
CDK1	NA	NA	0.0102828	NA	NA	NA	NA
CDK9	NA	NA	0.0102828	NA	NA	NA	NA
BCL2L2	NA	0.00925926	NA	NA	NA	NA	NA
FANCL	NA	0.00925926	NA	NA	NA	NA	NA
FGF10	NA	0.00925926	NA	NA	NA	NA	NA
KLHL6	NA	0.00925926	NA	NA	NA	NA	NA
PAK3	NA	0.00925926	NA	NA	NA	NA	NA
SOX10	NA	0.00925926	NA	NA	NA	NA	NA
E2F3	0.0089153	NA	NA	NA	NA	NA	NA
PIK3R3	0.0089153	NA	NA	NA	NA	NA	NA
VTCN1	0.0089153	NA	NA	NA	NA	NA	NA
ACVR1	0.00877193	NA	NA	NA	NA	NA	NA
BCL10	0.00877193	NA	NA	NA	NA	NA	NA
CXCR4	0.00877193	NA	NA	NA	NA	NA	NA
HIST1H3E	0.00877193	NA	NA	NA	NA	NA	NA
HIST1H3J	0.00877193	NA	NA	NA	NA	NA	NA
TRAF2	0.00877193	NA	NA	NA	NA	NA	NA
PHF6	NA	NA	0.00771208	NA	NA	NA	NA
CTLA4	0.00742942	NA	NA	NA	NA	NA	NA
SH2D1A	0.00742942	NA	NA	NA	NA	NA	NA
YAP1	0.00742942	NA	NA	NA	NA	NA	NA
CALR	0.00657895	NA	NA	NA	NA	NA	NA
H3F3B	0.00657895	NA	NA	NA	NA	NA	NA
HIST1H3H	0.00657895	NA	NA	NA	NA	NA	NA
BCL2L11	0.00594354	NA	NA	NA	NA	NA	NA
EGFL7	0.00594354	NA	NA	NA	NA	NA	NA
EIF1AX	0.00594354	NA	NA	NA	NA	NA	NA
EPCAM	0.00594354	NA	NA	NA	NA	NA	NA
IL10	0.00594354	NA	NA	NA	NA	NA	NA
RYBP	0.00594354	NA	NA	NA	NA	NA	NA
BCL2L12	NA	NA	0.00514139	NA	NA	NA	NA
CDK2	NA	NA	0.00514139	NA	NA	NA	NA
CDKN1C	NA	NA	0.00514139	NA	NA	NA	NA
GPC3	NA	NA	0.00514139	NA	NA	NA	NA
INSRR	NA	NA	0.00514139	NA	NA	NA	NA
SBDS	NA	NA	0.00514139	NA	NA	NA	NA
LMO2	NA	NA	0.00514139	NA	NA	NA	NA
GNB2L1	NA	NA	0.00462963	NA	NA	NA	NA
NPRL2	NA	NA	0.00462963	NA	NA	NA	NA
SYNE1	NA	NA	0.00462963	NA	NA	NA	NA
BMPR1B	0.00460829	NA	NA	NA	NA	NA	NA
GRB7	0.00460829	NA	NA	NA	NA	NA	NA
NCOA4	0.00460829	NA	NA	NA	NA	NA	NA
PAPSS1	0.00460829	NA	NA	NA	NA	NA	NA
PARD3B	0.00460829	NA	NA	NA	NA	NA	NA
PIBF1	0.00460829	NA	NA	NA	NA	NA	NA
SEC24B	0.00460829	NA	NA	NA	NA	NA	NA
TOP1MT	0.00460829	NA	NA	NA	NA	NA	NA
TRAP1	0.00460829	NA	NA	NA	NA	NA	NA
HIST1H3B	0.00445765	NA	NA	NA	NA	NA	NA
TMEM127	0.00445765	NA	NA	NA	NA	NA	NA
CUL1	0.00445765	NA	NA	NA	NA	NA	NA
DNAJB1	0.00438596	NA	NA	NA	NA	NA	NA
EIF4A2	0.00438596	NA	NA	NA	NA	NA	NA
EIF4E	0.00438596	NA	NA	NA	NA	NA	NA
HIST1H3D	0.00438596	NA	NA	NA	NA	NA	NA
HIST1H3F	0.00438596	NA	NA	NA	NA	NA	NA
HIST1H3G	0.00438596	NA	NA	NA	NA	NA	NA
HIST3H3	0.00438596	NA	NA	NA	NA	NA	NA
MST1	0.00438596	NA	NA	NA	NA	NA	NA
PPP6C	0.00438596	NA	NA	NA	NA	NA	NA
STAT5A	0.00438596	NA	NA	NA	NA	NA	NA
MAX	0.00297177	NA	NA	NA	NA	NA	NA
CD276	0.00297177	NA	NA	NA	NA	NA	NA
DCUN1D1	0.00297177	NA	NA	NA	NA	NA	NA
RIT1	0.00297177	NA	NA	NA	NA	NA	NA
LMO3	NA	NA	0.00257069	NA	NA	NA	NA
RPL26	NA	NA	0.00257069	NA	NA	NA	NA
HIST1H3C	0.00219298	NA	NA	NA	NA	NA	NA
RAB35	0.00219298	NA	NA	NA	NA	NA	NA
TCEB1	0.00219298	NA	NA	NA	NA	NA	NA
AKAP11	0.00219298	NA	NA	NA	NA	NA	NA
ATP8A2	0.00219298	NA	NA	NA	NA	NA	NA
CDH26	0.00219298	NA	NA	NA	NA	NA	NA
CHN1	0.00219298	NA	NA	NA	NA	NA	NA
CLVS1	0.00219298	NA	NA	NA	NA	NA	NA
COL1A2	0.00219298	NA	NA	NA	NA	NA	NA
EXTL3	0.00219298	NA	NA	NA	NA	NA	NA
GADL1	0.00219298	NA	NA	NA	NA	NA	NA
LMNA	0.00219298	NA	NA	NA	NA	NA	NA
LRRC27	0.00219298	NA	NA	NA	NA	NA	NA
MIR365B	0.00219298	NA	NA	NA	NA	NA	NA
NT5DC1	0.00219298	NA	NA	NA	NA	NA	NA
PCMT1	0.00219298	NA	NA	NA	NA	NA	NA
RAB11FIP1	0.00219298	NA	NA	NA	NA	NA	NA
SLC9A3R2	0.00219298	NA	NA	NA	NA	NA	NA
SUPT4H1	0.00219298	NA	NA	NA	NA	NA	NA
TSPAN8	0.00219298	NA	NA	NA	NA	NA	NA
YWHAEP7	0.00219298	NA	NA	NA	NA	NA	NA
ZNF599	0.00219298	NA	NA	NA	NA	NA	NA
PDPK1	0.00148588	NA	NA	NA	NA	NA	NA
STK40	0.00148588	NA	NA	NA	NA	NA	NA
