# Supplementary material for: AACR Project GENIE: Powering Precision Medicine through an International Consortium
Source: Oxford University Press journal article supplement (doi:10.1158/2159-8290.cd-17-0151), 2017-06-01
Supplement: 21598290cd170151-sup-178736_2_supp_4021824_yphxrk.xlsx [file 21598290cd170151-sup-178736_2_supp_4021824_yphxrk.xlsx]

## Sheet: Sheet1
Gene	Alteration	Disease	Drug(s)	Level of evidence	PMIDs
ABL1	BCR-ABL1 Fusion	Leukemia (CML)	Imatinib	LEVEL_1	11287972;11287973;12637609
ABL1	BCR-ABL1 Fusion	Leukemia (CML)	Nilotinib	LEVEL_1	20525993;23502220
ABL1	BCR-ABL1 Fusion	Leukemia (CML)	Dasatnib	LEVEL_1	20525995;22160483
ABL1	BCR-ABL1 Fusion	Leukemia (ALL)	Imatinib	LEVEL_1	12200353;11287973
ALK	Fusions	Non-Small Cell Lung Cancer	Crizotinib	LEVEL_1	23724913
ALK	Fusions	Non-Small Cell Lung Cancer	Ceritinib	LEVEL_1	24670165;26973324
ALK	Fusions	Non-Small Cell Lung Cancer	Alectinib	LEVEL_1	26708155;26598747
BRAF	V600D	Melanoma	Dabrafenib+Trametinib	LEVEL_1	25089220;23846731;22663011;23020132;25287827;25399551;25265492
BRAF	V600E	Melanoma	Dabrafenib+Trametinib	LEVEL_1	25089220;23846731;22663011;23020132;25287827;25399551;25265492
BRAF	V600G	Melanoma	Dabrafenib+Trametinib	LEVEL_1	25089220;23846731;22663011;23020132;25287827;25399551;25265492
BRAF	V600K	Melanoma	Dabrafenib+Trametinib	LEVEL_1	25089220;23846731;22663011;23020132;25287827;25399551;25265492
BRAF	V600M	Melanoma	Dabrafenib+Trametinib	LEVEL_1	25089220;23846731;22663011;23020132;25287827;25399551;25265492
BRAF	V600R	Melanoma	Dabrafenib+Trametinib	LEVEL_1	25089220;23846731;22663011;23020132;25287827;25399551;25265492
BRAF	V600D	Melanoma	Cobimetinib+Vemurafenib	LEVEL_1	25265494
BRAF	V600E	Melanoma	Cobimetinib+Vemurafenib	LEVEL_1	25265494
BRAF	V600G	Melanoma	Cobimetinib+Vemurafenib	LEVEL_1	25265494
BRAF	V600K	Melanoma	Cobimetinib+Vemurafenib	LEVEL_1	25265494
BRAF	V600M	Melanoma	Cobimetinib+Vemurafenib	LEVEL_1	25265494
BRAF	V600R	Melanoma	Cobimetinib+Vemurafenib	LEVEL_1	25265494
BRAF	V600D	Melanoma	Dabrafenib	LEVEL_1	25089220;22735384;23051966;22608338;23918947
BRAF	V600E	Melanoma	Dabrafenib	LEVEL_1	25089220;22735384;23051966;22608338;23918947
BRAF	V600G	Melanoma	Dabrafenib	LEVEL_1	25089220;22735384;23051966;22608338;23918947
BRAF	V600K	Melanoma	Dabrafenib	LEVEL_1	25089220;22735384;23051966;22608338;23918947
BRAF	V600M	Melanoma	Dabrafenib	LEVEL_1	25089220;22735384;23051966;22608338;23918947
BRAF	V600R	Melanoma	Dabrafenib	LEVEL_1	25089220;22735384;23051966;22608338;23918947
BRAF	V600D	Melanoma	Vemurafenib	LEVEL_1	20818844;24508103;25399551
BRAF	V600E	Melanoma	Vemurafenib	LEVEL_1	20818844;24508103;25399551
BRAF	V600G	Melanoma	Vemurafenib	LEVEL_1	20818844;24508103;25399551
BRAF	V600K	Melanoma	Vemurafenib	LEVEL_1	20818844;24508103;25399551
BRAF	V600M	Melanoma	Vemurafenib	LEVEL_1	20818844;24508103;25399551
BRAF	V600R	Melanoma	Vemurafenib	LEVEL_1	20818844;24508103;25399551
BRAF	V600E	Melanoma	Trametinib	LEVEL_1	23846731;22663011;25399551;25265492
BRAF	V600K	Melanoma	Trametinib	LEVEL_1	23846731;22663011;25399551;25265492
BRCA1	Oncogenic Mutations	Ovarian Cancer	Rucaparib	LEVEL_1
BRCA2	Oncogenic Mutations	Ovarian Cancer	Rucaparib	LEVEL_1
EGFR	729_761del	Non-Small Cell Lung Cancer	Erlotinib	LEVEL_1	15638953;22285168
EGFR	729_761indel	Non-Small Cell Lung Cancer	Erlotinib	LEVEL_1	15638953;22285168
EGFR	L858R	Non-Small Cell Lung Cancer	Erlotinib	LEVEL_1	15638953;22285168
EGFR	729_761del	Non-Small Cell Lung Cancer	Afatinib	LEVEL_1	18408761;22452895;23816960;25589191
EGFR	729_761indel	Non-Small Cell Lung Cancer	Afatinib	LEVEL_1	18408761;22452895;23816960;25589191
EGFR	L858R	Non-Small Cell Lung Cancer	Afatinib	LEVEL_1	18408761;22452895;23816960;25589191
EGFR	729_761del	Non-Small Cell Lung Cancer	Gefitinib	LEVEL_1	14570950;19692680;21670455;20573926;20022809;22370314
EGFR	729_761indel	Non-Small Cell Lung Cancer	Gefitinib	LEVEL_1	14570950;19692680;21670455;20573926;20022809;22370314
EGFR	L858R	Non-Small Cell Lung Cancer	Gefitinib	LEVEL_1	14570950;19692680;21670455;20573926;20022809;22370314
EGFR	729_761ins	Non-Small Cell Lung Cancer	Erlotinib	LEVEL_1	22190593
EGFR	729_761ins	Non-Small Cell Lung Cancer	Afatinib	LEVEL_1	22190593
EGFR	729_761ins	Non-Small Cell Lung Cancer	Gefitinib	LEVEL_1	22190593
EGFR	L861Q	Non-Small Cell Lung Cancer	Erlotinib	LEVEL_1	15638953;14570950;18408761;21531810;21252719
EGFR	L861Q	Non-Small Cell Lung Cancer	Gefitinib	LEVEL_1	15638953;14570950;18408761;21531810;21252719
EGFR	L861Q	Non-Small Cell Lung Cancer	Afatinib	LEVEL_1	15638953;14570950;18408761;21531810;21252719
EGFR	L861R	Non-Small Cell Lung Cancer	Erlotinib	LEVEL_1	15638953;14570950;18408761;21531810;21252719
EGFR	L861R	Non-Small Cell Lung Cancer	Gefitinib	LEVEL_1	15638953;14570950;18408761;21531810;21252719
EGFR	L861R	Non-Small Cell Lung Cancer	Afatinib	LEVEL_1	15638953;14570950;18408761;21531810;21252719
EGFR	G719A	Non-Small Cell Lung Cancer	Erlotinib	LEVEL_1	15638953;14570950;18408761;21531810;15118073;16011858;21670455;20573926;26051236;24285021;16187797
EGFR	G719A	Non-Small Cell Lung Cancer	Gefitinib	LEVEL_1	15638953;14570950;18408761;21531810;15118073;16011858;21670455;20573926;26051236;24285021;16187797
EGFR	G719A	Non-Small Cell Lung Cancer	Afatinib	LEVEL_1	15638953;14570950;18408761;21531810;15118073;16011858;21670455;20573926;26051236;24285021;16187797
EGFR	G719C	Non-Small Cell Lung Cancer	Erlotinib	LEVEL_1	15638953;14570950;18408761;21531810;15118073;16011858;21670455;20573926;26051236;24285021;16187797
EGFR	G719C	Non-Small Cell Lung Cancer	Gefitinib	LEVEL_1	15638953;14570950;18408761;21531810;15118073;16011858;21670455;20573926;26051236;24285021;16187797
EGFR	G719C	Non-Small Cell Lung Cancer	Afatinib	LEVEL_1	15638953;14570950;18408761;21531810;15118073;16011858;21670455;20573926;26051236;24285021;16187797
EGFR	G719D	Non-Small Cell Lung Cancer	Erlotinib	LEVEL_1	15638953;14570950;18408761;21531810;15118073;16011858;21670455;20573926;26051236;24285021;16187797
EGFR	G719D	Non-Small Cell Lung Cancer	Gefitinib	LEVEL_1	15638953;14570950;18408761;21531810;15118073;16011858;21670455;20573926;26051236;24285021;16187797
EGFR	G719D	Non-Small Cell Lung Cancer	Afatinib	LEVEL_1	15638953;14570950;18408761;21531810;15118073;16011858;21670455;20573926;26051236;24285021;16187797
EGFR	G719S	Non-Small Cell Lung Cancer	Erlotinib	LEVEL_1	15638953;14570950;18408761;21531810;15118073;16011858;21670455;20573926;26051236;24285021;16187797
EGFR	G719S	Non-Small Cell Lung Cancer	Gefitinib	LEVEL_1	15638953;14570950;18408761;21531810;15118073;16011858;21670455;20573926;26051236;24285021;16187797
EGFR	G719S	Non-Small Cell Lung Cancer	Afatinib	LEVEL_1	15638953;14570950;18408761;21531810;15118073;16011858;21670455;20573926;26051236;24285021;16187797
EGFR	T790M	Non-Small Cell Lung Cancer	Osimertinib	LEVEL_1	25923549
EGFR	S768I	Non-Small Cell Lung Cancer	Erlotinib	LEVEL_1	15638953;14570950;18408761;17285735;25521405;26051236
EGFR	S768I	Non-Small Cell Lung Cancer	Gefitnib	LEVEL_1	15638953;14570950;18408761;17285735;25521405;26051236
EGFR	S768I	Non-Small Cell Lung Cancer	Afatinib	LEVEL_1	15638953;14570950;18408761;17285735;25521405;26051236
EGFR	A763_Y764insFQEA	Non-Small Cell Lung Cancer	Erlotinib	LEVEL_1	15638953;14570950;18408761;24353160;23969006
EGFR	A763_Y764insFQEA	Non-Small Cell Lung Cancer	Afatnib	LEVEL_1	15638953;14570950;18408761;24353160;23969006
EGFR	A763_Y764insFQEA	Non-Small Cell Lung Cancer	Gefitnib	LEVEL_1	15638953;14570950;18408761;24353160;23969006
EGFR	E709_T710delinsD	Non-Small Cell Lung Cancer	Erlotinib	LEVEL_1	15638953;14570950;18408761;26206867
EGFR	E709_T710delinsD	Non-Small Cell Lung Cancer	Gefitinib	LEVEL_1	15638953;14570950;18408761;26206867
EGFR	E709_T710delinsD	Non-Small Cell Lung Cancer	Afatinib	LEVEL_1	15638953;14570950;18408761;26206867
EGFR	EGFR-KDD	Non-Small Cell Lung Cancer	Erlotinib	LEVEL_1	15638953;14570950;18408761;26286086
EGFR	EGFR-KDD	Non-Small Cell Lung Cancer	Gefitinib	LEVEL_1	15638953;14570950;18408761;26286086
EGFR	EGFR-KDD	Non-Small Cell Lung Cancer	Afatinib	LEVEL_1	15638953;14570950;18408761;26286086
EGFR	E709K	Non-Small Cell Lung Cancer	Erlotinib	LEVEL_1	15710947;25179728;23566546;18000506;23749122;25130612
EGFR	E709K	Non-Small Cell Lung Cancer	Afatinib	LEVEL_1	15710947;25179728;23566546;18000506;23749122;25130612
EGFR	E709K	Non-Small Cell Lung Cancer	Gefitinib	LEVEL_1	15710947;25179728;23566546;18000506;23749122;25130612
EGFR	A289V	Non-Small Cell Lung Cancer	Erlotinib	LEVEL_1	17177598
EGFR	L747P	Non-Small Cell Lung Cancer	Erlotinib	LEVEL_1	22190593
EGFR	L747P	Non-Small Cell Lung Cancer	Afatinib	LEVEL_1	22190593
EGFR	L747P	Non-Small Cell Lung Cancer	Gefitinib	LEVEL_1	22190593
EGFR	D761Y	Non-Small Cell Lung Cancer	Erlotinib	LEVEL_1	17192902
EGFR	D761Y	Non-Small Cell Lung Cancer	Afatinib	LEVEL_1	17192902
EGFR	D761Y	Non-Small Cell Lung Cancer	Gefitinib	LEVEL_1	17192902
EGFR	G598V	Non-Small Cell Lung Cancer	Erlotinib	LEVEL_1	17177598
EGFR	S720F	Non-Small Cell Lung Cancer	Erlotinib	LEVEL_1	21531810;19060236;18508816
EGFR	S720F	Non-Small Cell Lung Cancer	Afatinib	LEVEL_1	21531810;19060236;18508816
EGFR	S720F	Non-Small Cell Lung Cancer	Gefitinib	LEVEL_1	21531810;19060236;18508816
EGFR	T854S	Non-Small Cell Lung Cancer	Afatinib	LEVEL_1	19010870
ERBB2	Amplification	Breast Cancer	Trastuzumab	LEVEL_1	16236738;16236737;23871490;21768458;11248153;10561337
ERBB2	Amplification	Breast Cancer	Ado-trastuzumab emtansine	LEVEL_1	20730488;23020162
ERBB2	Amplification	Breast Cancer	Pertuzumab+Trastuzumab	LEVEL_1	23602601;22149875;22153890
ERBB2	Amplification	Breast Cancer	Lapatinib	LEVEL_1	17591827;16452222;17192538;19786658
ERBB2	Amplification	Esophagogastric Cancer	Trastuzumab	LEVEL_1	20728210
KIT	449_514mut	Gastrointestinal Stromal Tumor	Imatinib	LEVEL_1	12181401;15451219;16098458;18235121
KIT	550_592mut	Gastrointestinal Stromal Tumor	Imatinib	LEVEL_1	12181401;15451219;16098458;18235121
KIT	D419del	Gastrointestinal Stromal Tumor	Imatinib	LEVEL_1	12181401;15451219;16098458;18235121
KIT	D579del	Gastrointestinal Stromal Tumor	Imatinib	LEVEL_1	12181401;15451219;16098458;18235121
KIT	E554_V559del	Gastrointestinal Stromal Tumor	Imatinib	LEVEL_1	12181401;15451219;16098458;18235121
KIT	I563_L576del	Gastrointestinal Stromal Tumor	Imatinib	LEVEL_1	12181401;15451219;16098458;18235121
KIT	I653T	Gastrointestinal Stromal Tumor	Imatinib	LEVEL_1	12181401;15451219;16098458;18235121
KIT	K550_W557del	Gastrointestinal Stromal Tumor	Imatinib	LEVEL_1	12181401;15451219;16098458;18235121
KIT	K558delinsNP	Gastrointestinal Stromal Tumor	Imatinib	LEVEL_1	12181401;15451219;16098458;18235121
KIT	K558N	Gastrointestinal Stromal Tumor	Imatinib	LEVEL_1	12181401;15451219;16098458;18235121
KIT	K558_V559del	Gastrointestinal Stromal Tumor	Imatinib	LEVEL_1	12181401;15451219;16098458;18235121
KIT	K642E	Gastrointestinal Stromal Tumor	Imatinib	LEVEL_1	12181401;15451219;16098458;18235121
KIT	L576P	Gastrointestinal Stromal Tumor	Imatinib	LEVEL_1	12181401;15451219;16098458;18235121
KIT	M541L	Gastrointestinal Stromal Tumor	Imatinib	LEVEL_1	12181401;15451219;16098458;18235121
KIT	M552_W557del	Gastrointestinal Stromal Tumor	Imatinib	LEVEL_1	12181401;15451219;16098458;18235121
KIT	N822H	Gastrointestinal Stromal Tumor	Imatinib	LEVEL_1	12181401;15451219;16098458;18235121
KIT	P573_D579del	Gastrointestinal Stromal Tumor	Imatinib	LEVEL_1	12181401;15451219;16098458;18235121
KIT	P577_W582delinsPYD	Gastrointestinal Stromal Tumor	Imatinib	LEVEL_1	12181401;15451219;16098458;18235121
KIT	P838L	Gastrointestinal Stromal Tumor	Imatinib	LEVEL_1	12181401;15451219;16098458;18235121
KIT	T574insTQLPYD	Gastrointestinal Stromal Tumor	Imatinib	LEVEL_1	12181401;15451219;16098458;18235121
KIT	V555_L576del	Gastrointestinal Stromal Tumor	Imatinib	LEVEL_1	12181401;15451219;16098458;18235121
KIT	V555_V559del	Gastrointestinal Stromal Tumor	Imatinib	LEVEL_1	12181401;15451219;16098458;18235121
KIT	V559C	Gastrointestinal Stromal Tumor	Imatinib	LEVEL_1	12181401;15451219;16098458;18235121
KIT	V559D	Gastrointestinal Stromal Tumor	Imatinib	LEVEL_1	12181401;15451219;16098458;18235121
KIT	V559del	Gastrointestinal Stromal Tumor	Imatinib	LEVEL_1	12181401;15451219;16098458;18235121
KIT	V559G	Gastrointestinal Stromal Tumor	Imatinib	LEVEL_1	12181401;15451219;16098458;18235121
KIT	V559_V560del	Gastrointestinal Stromal Tumor	Imatinib	LEVEL_1	12181401;15451219;16098458;18235121
KIT	V560D	Gastrointestinal Stromal Tumor	Imatinib	LEVEL_1	12181401;15451219;16098458;18235121
KIT	V560del	Gastrointestinal Stromal Tumor	Imatinib	LEVEL_1	12181401;15451219;16098458;18235121
KIT	V560G	Gastrointestinal Stromal Tumor	Imatinib	LEVEL_1	12181401;15451219;16098458;18235121
KIT	V569_L576del	Gastrointestinal Stromal Tumor	Imatinib	LEVEL_1	12181401;15451219;16098458;18235121
KIT	W557_K558del	Gastrointestinal Stromal Tumor	Imatinib	LEVEL_1	12181401;15451219;16098458;18235121
KIT	Y553N	Gastrointestinal Stromal Tumor	Imatinib	LEVEL_1	12181401;15451219;16098458;18235121
KIT	Y553_K558del	Gastrointestinal Stromal Tumor	Imatinib	LEVEL_1	12181401;15451219;16098458;18235121
KIT	Y570H	Gastrointestinal Stromal Tumor	Imatinib	LEVEL_1	12181401;15451219;16098458;18235121
KIT	Y578C	Gastrointestinal Stromal Tumor	Imatinib	LEVEL_1	12181401;15451219;16098458;18235121
KIT	449_514mut	Gastrointestinal Stromal Tumor	Sunitinib	LEVEL_1	17046465;19282169;25641662
KIT	550_592mut	Gastrointestinal Stromal Tumor	Sunitinib	LEVEL_1	17046465;19282169;25641662
KIT	A502_Y503dup	Gastrointestinal Stromal Tumor	Sunitinib	LEVEL_1	17046465;19282169;25641662
KIT	D579del	Gastrointestinal Stromal Tumor	Sunitinib	LEVEL_1	17046465;19282169;25641662
KIT	D820G	Gastrointestinal Stromal Tumor	Sunitinib	LEVEL_1	17046465;19282169;25641662
KIT	E554_K558del	Gastrointestinal Stromal Tumor	Sunitinib	LEVEL_1	17046465;19282169;25641662
KIT	H697Y	Gastrointestinal Stromal Tumor	Sunitinib	LEVEL_1	17046465;19282169;25641662
KIT	K550_W557del	Gastrointestinal Stromal Tumor	Sunitinib	LEVEL_1	17046465;19282169;25641662
KIT	K558delinsNP	Gastrointestinal Stromal Tumor	Sunitinib	LEVEL_1	17046465;19282169;25641662
KIT	L576P	Gastrointestinal Stromal Tumor	Sunitinib	LEVEL_1	17046465;19282169;25641662
KIT	P551_M552del	Gastrointestinal Stromal Tumor	Sunitinib	LEVEL_1	17046465;19282169;25641662
KIT	V555_L576del	Gastrointestinal Stromal Tumor	Sunitinib	LEVEL_1	17046465;19282169;25641662
KIT	V560D	Gastrointestinal Stromal Tumor	Sunitinib	LEVEL_1	17046465;19282169;25641662
KIT	V560del	Gastrointestinal Stromal Tumor	Sunitinib	LEVEL_1	17046465;19282169;25641662
KIT	V654A	Gastrointestinal Stromal Tumor	Sunitinib	LEVEL_1	17046465;19282169;25641662
KIT	W557_K558del	Gastrointestinal Stromal Tumor	Sunitinib	LEVEL_1	17046465;19282169;25641662
KIT	449_514mut	Gastrointestinal Stromal Tumor	Regorafenib	LEVEL_1	23177515
KIT	550_592mut	Gastrointestinal Stromal Tumor	Regorafenib	LEVEL_1	23177515
KIT	D820G	Gastrointestinal Stromal Tumor	Regorafenib	LEVEL_1	23177515
KIT	D820Y	Gastrointestinal Stromal Tumor	Regorafenib	LEVEL_1	23177515
KIT	K550_W557del	Gastrointestinal Stromal Tumor	Regorafenib	LEVEL_1	23177515
KIT	K558delinsNP	Gastrointestinal Stromal Tumor	Regorafenib	LEVEL_1	23177515
KIT	N822K	Gastrointestinal Stromal Tumor	Regorafenib	LEVEL_1	23177515
KIT	V560D	Gastrointestinal Stromal Tumor	Regorafenib	LEVEL_1	23177515
KIT	W557_K558del	Gastrointestinal Stromal Tumor	Regorafenib	LEVEL_1	23177515
KRAS	Wildtype	Colorectal Cancer	Cetuximab	LEVEL_1	15269313;19339720;15677699;24739896
KRAS	Wildtype	Colorectal Cancer	Panitumumab	LEVEL_1	17470858;20921465;20921462;24739896
KRAS	Wildtype	Colorectal Cancer	Regorafenib	LEVEL_1	23177514
PDGFRA	FIP1L1-PDGFRA Fusion	Leukemia	Imatinib	LEVEL_1	24963404;12660384;14504092;21224473;22745105;24407160;19212337;16754777;27021554;12781364
PDGFRA	Fusions	Myelodysplasia	Imatinib	LEVEL_1	14504092;12660384;17555450;16498388;16845659;12944919;15034867
PDGFRA	Fusions	Myeloproliferative Neoplasm	Imatinib	LEVEL_1	14504092;12660384;17555450;16498388;16845659;12944919;15034867
PDGFRB	Fusions	Myelodysplasia	Imatinib	LEVEL_1	24963404;12181402;16960151;18950453;22897847;14504092;24687085;1516603;12676775
PDGFRB	Fusions	Myeloproliferative Neoplasm	Imatinib	LEVEL_1	24963404;12181402;16960151;18950453;22897847;14504092;24687085;1516603;12676775
PDGFRB	Fusions	Dermatofibrosarcoma Protuberans	Imatinib	LEVEL_1	24963404;21128251;15503291;15746584;19620561;20439456;15681532
ROS1	Fusions	Non-Small Cell Lung Cancer	Crizotinib	LEVEL_1	25264305
ALK	Fusions	Soft Tissue Sarcoma	Crizotinib	LEVEL_2A	20979472;23598171
ALK	Fusions	Soft Tissue Sarcoma	Ceritinib	LEVEL_2A	24670165
BRAF	V600D	Non-Small Cell Lung Cancer	Vemurafenib	LEVEL_2A	20818844;26287849;26200454;23733758;22743296;24888229;26776917;25466451
BRAF	V600E	Non-Small Cell Lung Cancer	Vemurafenib	LEVEL_2A	20818844;26287849;26200454;23733758;22743296;24888229;26776917;25466451
BRAF	V600G	Non-Small Cell Lung Cancer	Vemurafenib	LEVEL_2A	20818844;26287849;26200454;23733758;22743296;24888229;26776917;25466451
BRAF	V600K	Non-Small Cell Lung Cancer	Vemurafenib	LEVEL_2A	20818844;26287849;26200454;23733758;22743296;24888229;26776917;25466451
BRAF	V600M	Non-Small Cell Lung Cancer	Vemurafenib	LEVEL_2A	20818844;26287849;26200454;23733758;22743296;24888229;26776917;25466451
BRAF	V600R	Non-Small Cell Lung Cancer	Vemurafenib	LEVEL_2A	20818844;26287849;26200454;23733758;22743296;24888229;26776917;25466451
BRAF	V600D	Non-Small Cell Lung Cancer	Dabrafenib+Trametinib	LEVEL_2A	25089220;22663011;27283860
BRAF	V600E	Non-Small Cell Lung Cancer	Dabrafenib+Trametinib	LEVEL_2A	25089220;22663011;27283860
BRAF	V600G	Non-Small Cell Lung Cancer	Dabrafenib+Trametinib	LEVEL_2A	25089220;22663011;27283860
BRAF	V600K	Non-Small Cell Lung Cancer	Dabrafenib+Trametinib	LEVEL_2A	25089220;22663011;27283860
BRAF	V600M	Non-Small Cell Lung Cancer	Dabrafenib+Trametinib	LEVEL_2A	25089220;22663011;27283860
BRAF	V600R	Non-Small Cell Lung Cancer	Dabrafenib+Trametinib	LEVEL_2A	25089220;22663011;27283860
BRAF	V600D	Non-Small Cell Lung Cancer	Dabrafenib	LEVEL_2A	25089220;27080216;26200454;23733758;22743296;24888229;26776917;25466451
BRAF	V600E	Non-Small Cell Lung Cancer	Dabrafenib	LEVEL_2A	25089220;27080216;26200454;23733758;22743296;24888229;26776917;25466451
BRAF	V600G	Non-Small Cell Lung Cancer	Dabrafenib	LEVEL_2A	25089220;27080216;26200454;23733758;22743296;24888229;26776917;25466451
BRAF	V600K	Non-Small Cell Lung Cancer	Dabrafenib	LEVEL_2A	25089220;27080216;26200454;23733758;22743296;24888229;26776917;25466451
BRAF	V600M	Non-Small Cell Lung Cancer	Dabrafenib	LEVEL_2A	25089220;27080216;26200454;23733758;22743296;24888229;26776917;25466451
BRAF	V600R	Non-Small Cell Lung Cancer	Dabrafenib	LEVEL_2A	25089220;27080216;26200454;23733758;22743296;24888229;26776917;25466451
BRAF	V600D	Histiocytosis	Vemurafenib	LEVEL_2A	20818844;26287849
BRAF	V600E	Histiocytosis	Vemurafenib	LEVEL_2A	20818844;26287849
BRAF	V600G	Histiocytosis	Vemurafenib	LEVEL_2A	20818844;26287849
BRAF	V600K	Histiocytosis	Vemurafenib	LEVEL_2A	20818844;26287849
BRAF	V600M	Histiocytosis	Vemurafenib	LEVEL_2A	20818844;26287849
BRAF	V600R	Histiocytosis	Vemurafenib	LEVEL_2A	20818844;26287849
BRCA1	Oncogenic Mutations	Ovarian Cancer	Olaparib	LEVEL_2A	25366685;20406929;19553641;21862407;20609468
BRCA2	Oncogenic Mutations	Ovarian Cancer	Olaparib	LEVEL_2A	25366685;20406929;19553641;21862407;20609468
CDK4	Amplification	Soft Tissue Sarcoma	Palbociclib	LEVEL_2A	23569312;26324739;20601955;21610706
KIT	K642E	Melanoma	Imatinib	LEVEL_2A	12181401;15451219;16098458;18235121;23775962;21642685
KIT	L576P	Melanoma	Imatinib	LEVEL_2A	12181401;15451219;16098458;18235121;23775962;21642685
KIT	V559A	Melanoma	Imatinib	LEVEL_2A	12181401;15451219;16098458;18235121;23775962;21642685
KIT	449_514mut	Thymic Carcinoma	Sunitinib	LEVEL_2A	20571495;25592632
KIT	550_592mut	Thymic Carcinoma	Sunitinib	LEVEL_2A	20571495;25592632
KIT	A502_Y503dup	Thymic Carcinoma	Sunitinib	LEVEL_2A	20571495;25592632
KIT	D579del	Thymic Carcinoma	Sunitinib	LEVEL_2A	20571495;25592632
KIT	D820G	Thymic Carcinoma	Sunitinib	LEVEL_2A	20571495;25592632
KIT	E554_K558del	Thymic Carcinoma	Sunitinib	LEVEL_2A	20571495;25592632
KIT	H697Y	Thymic Carcinoma	Sunitinib	LEVEL_2A	20571495;25592632
KIT	K550_W557del	Thymic Carcinoma	Sunitinib	LEVEL_2A	20571495;25592632
KIT	K558delinsNP	Thymic Carcinoma	Sunitinib	LEVEL_2A	20571495;25592632
KIT	L576P	Thymic Carcinoma	Sunitinib	LEVEL_2A	20571495;25592632
KIT	P551_M552del	Thymic Carcinoma	Sunitinib	LEVEL_2A	20571495;25592632
KIT	V555_L576del	Thymic Carcinoma	Sunitinib	LEVEL_2A	20571495;25592632
KIT	V560D	Thymic Carcinoma	Sunitinib	LEVEL_2A	20571495;25592632
KIT	V560del	Thymic Carcinoma	Sunitinib	LEVEL_2A	20571495;25592632
KIT	V654A	Thymic Carcinoma	Sunitinib	LEVEL_2A	20571495;25592632
KIT	W557_K558del	Thymic Carcinoma	Sunitinib	LEVEL_2A	20571495;25592632
KIT	D820A	Gastrointestinal Stromal Tumor	Sorafenib	LEVEL_2A	23140824;22270258
KIT	D820E	Gastrointestinal Stromal Tumor	Sorafenib	LEVEL_2A	23140824;22270258
KIT	D820G	Gastrointestinal Stromal Tumor	Sorafenib	LEVEL_2A	23140824;22270258
KIT	D820Y	Gastrointestinal Stromal Tumor	Sorafenib	LEVEL_2A	23140824;22270258
KIT	K642E	Gastrointestinal Stromal Tumor	Sorafenib	LEVEL_2A	23140824;22270258
KIT	P577_D579del	Gastrointestinal Stromal Tumor	Sorafenib	LEVEL_2A	23140824;22270258
KIT	W557_K558del	Gastrointestinal Stromal Tumor	Sorafenib	LEVEL_2A	23140824;22270258
KIT	D820A	Thymic Tumor	Sorafenib	LEVEL_2A	19461405
KIT	D820E	Thymic Tumor	Sorafenib	LEVEL_2A	19461405
KIT	D820G	Thymic Tumor	Sorafenib	LEVEL_2A	19461405
KIT	D820Y	Thymic Tumor	Sorafenib	LEVEL_2A	19461405
KIT	K642E	Thymic Tumor	Sorafenib	LEVEL_2A	19461405
KIT	P577_D579del	Thymic Tumor	Sorafenib	LEVEL_2A	19461405
KIT	W557_K558del	Thymic Tumor	Sorafenib	LEVEL_2A	19461405
KIT	D816V	Gastrointestinal Stromal Tumor	Nilotinib	LEVEL_2A	19467857;21456006;22357255
KIT	D820A	Gastrointestinal Stromal Tumor	Nilotinib	LEVEL_2A	19467857;21456006;22357255
KIT	D820G	Gastrointestinal Stromal Tumor	Nilotinib	LEVEL_2A	19467857;21456006;22357255
KIT	D820Y	Gastrointestinal Stromal Tumor	Nilotinib	LEVEL_2A	19467857;21456006;22357255
KIT	K642E	Gastrointestinal Stromal Tumor	Nilotinib	LEVEL_2A	19467857;21456006;22357255
KIT	L576P	Gastrointestinal Stromal Tumor	Nilotinib	LEVEL_2A	19467857;21456006;22357255
KIT	V555_L576del	Gastrointestinal Stromal Tumor	Nilotinib	LEVEL_2A	19467857;21456006;22357255
KIT	V559C	Gastrointestinal Stromal Tumor	Nilotinib	LEVEL_2A	19467857;21456006;22357255
KIT	V559D	Gastrointestinal Stromal Tumor	Nilotinib	LEVEL_2A	19467857;21456006;22357255
KIT	V654A	Gastrointestinal Stromal Tumor	Nilotinib	LEVEL_2A	19467857;21456006;22357255
KIT	W557_K558del	Gastrointestinal Stromal Tumor	Nilotinib	LEVEL_2A	19467857;21456006;22357255
KIT	D816F	Gastrointestinal Stromal Tumor	Dasatinib	LEVEL_2A	17419150
KIT	D816Y	Gastrointestinal Stromal Tumor	Dasatinib	LEVEL_2A	17419150
KIT	D820G	Gastrointestinal Stromal Tumor	Dasatinib	LEVEL_2A	17419150
KIT	D820Y	Gastrointestinal Stromal Tumor	Dasatinib	LEVEL_2A	17419150
KIT	L576P	Gastrointestinal Stromal Tumor	Dasatinib	LEVEL_2A	17419150
KIT	V559D	Gastrointestinal Stromal Tumor	Dasatinib	LEVEL_2A	17419150
KIT	V560G	Gastrointestinal Stromal Tumor	Dasatinib	LEVEL_2A	17419150
KIT	W557_K558del	Gastrointestinal Stromal Tumor	Dasatinib	LEVEL_2A	17419150
MET	963_D1010splice	Non-Small Cell Lung Cancer	Crizotinib	LEVEL_2A	25971939;25971938;26729443;26215952;16397241;19096300;15735036
MET	981_1028splice	Non-Small Cell Lung Cancer	Crizotinib	LEVEL_2A	25971939;25971938;26729443;26215952;16397241;19096300;15735036
MET	X1006_splice	Non-Small Cell Lung Cancer	Crizotinib	LEVEL_2A	25971939;25971938;26729443;26215952;16397241;19096300;15735036
MET	X1007_splice	Non-Small Cell Lung Cancer	Crizotinib	LEVEL_2A	25971939;25971938;26729443;26215952;16397241;19096300;15735036
MET	X1008_splice	Non-Small Cell Lung Cancer	Crizotinib	LEVEL_2A	25971939;25971938;26729443;26215952;16397241;19096300;15735036
MET	X1009_splice	Non-Small Cell Lung Cancer	Crizotinib	LEVEL_2A	25971939;25971938;26729443;26215952;16397241;19096300;15735036
MET	X1010_splice	Non-Small Cell Lung Cancer	Crizotinib	LEVEL_2A	25971939;25971938;26729443;26215952;16397241;19096300;15735036
MET	X963_splice	Non-Small Cell Lung Cancer	Crizotinib	LEVEL_2A	25971939;25971938;26729443;26215952;16397241;19096300;15735036
MET	Amplification	Non-Small Cell Lung Cancer	Crizotinib	LEVEL_2A	21623265
PDGFRA	D842V	Gastrointestinal Stromal Tumor	Dasatinib	LEVEL_2A	15928335;17419150;18794084
PDGFRA	560_561insER	Gastrointestinal Stromal Tumor	Imatinib	LEVEL_2A	24963404;15928335
PDGFRA	A633T	Gastrointestinal Stromal Tumor	Imatinib	LEVEL_2A	24963404;15928335
PDGFRA	C456_N468del	Gastrointestinal Stromal Tumor	Imatinib	LEVEL_2A	24963404;15928335
PDGFRA	C456_R481del	Gastrointestinal Stromal Tumor	Imatinib	LEVEL_2A	24963404;15928335
PDGFRA	D842I	Gastrointestinal Stromal Tumor	Imatinib	LEVEL_2A	24963404;15928335
PDGFRA	D842_H845del	Gastrointestinal Stromal Tumor	Imatinib	LEVEL_2A	24963404;15928335
PDGFRA	D842_M844del	Gastrointestinal Stromal Tumor	Imatinib	LEVEL_2A	24963404;15928335
PDGFRA	D846Y	Gastrointestinal Stromal Tumor	Imatinib	LEVEL_2A	24963404;15928335
PDGFRA	E311_K312del	Gastrointestinal Stromal Tumor	Imatinib	LEVEL_2A	24963404;15928335
PDGFRA	G853D	Gastrointestinal Stromal Tumor	Imatinib	LEVEL_2A	24963404;15928335
PDGFRA	H650Q	Gastrointestinal Stromal Tumor	Imatinib	LEVEL_2A	24963404;15928335
PDGFRA	H845Y	Gastrointestinal Stromal Tumor	Imatinib	LEVEL_2A	24963404;15928335
PDGFRA	I843del	Gastrointestinal Stromal Tumor	Imatinib	LEVEL_2A	24963404;15928335
PDGFRA	N659K	Gastrointestinal Stromal Tumor	Imatinib	LEVEL_2A	24963404;15928335
PDGFRA	N659R	Gastrointestinal Stromal Tumor	Imatinib	LEVEL_2A	24963404;15928335
PDGFRA	N659S	Gastrointestinal Stromal Tumor	Imatinib	LEVEL_2A	24963404;15928335
PDGFRA	N848K	Gastrointestinal Stromal Tumor	Imatinib	LEVEL_2A	24963404;15928335
PDGFRA	P577S	Gastrointestinal Stromal Tumor	Imatinib	LEVEL_2A	24963404;15928335
PDGFRA	Q579R	Gastrointestinal Stromal Tumor	Imatinib	LEVEL_2A	24963404;15928335
PDGFRA	R748G	Gastrointestinal Stromal Tumor	Imatinib	LEVEL_2A	24963404;15928335
PDGFRA	R841K	Gastrointestinal Stromal Tumor	Imatinib	LEVEL_2A	24963404;15928335
PDGFRA	S566_E571delinsR	Gastrointestinal Stromal Tumor	Imatinib	LEVEL_2A	24963404;15928335
PDGFRA	S584L	Gastrointestinal Stromal Tumor	Imatinib	LEVEL_2A	24963404;15928335
PDGFRA	V469A	Gastrointestinal Stromal Tumor	Imatinib	LEVEL_2A	24963404;15928335
PDGFRA	V536E	Gastrointestinal Stromal Tumor	Imatinib	LEVEL_2A	24963404;15928335
PDGFRA	V561A	Gastrointestinal Stromal Tumor	Imatinib	LEVEL_2A	24963404;15928335
PDGFRA	V561D	Gastrointestinal Stromal Tumor	Imatinib	LEVEL_2A	24963404;15928335
PDGFRA	V568A	Gastrointestinal Stromal Tumor	Imatinib	LEVEL_2A	24963404;15928335
PDGFRA	V658A	Gastrointestinal Stromal Tumor	Imatinib	LEVEL_2A	24963404;15928335
PDGFRA	W559_R560del	Gastrointestinal Stromal Tumor	Imatinib	LEVEL_2A	24963404;15928335
PDGFRA	Y375_K455del	Gastrointestinal Stromal Tumor	Imatinib	LEVEL_2A	24963404;15928335
PDGFRA	Y555C	Gastrointestinal Stromal Tumor	Imatinib	LEVEL_2A	24963404;15928335
PDGFRA	Y849C	Gastrointestinal Stromal Tumor	Imatinib	LEVEL_2A	24963404;15928335
PDGFRA	Y849S	Gastrointestinal Stromal Tumor	Imatinib	LEVEL_2A	24963404;15928335
RET	Fusions	Non-Small Cell Lung Cancer	Cabozantinib	LEVEL_2A	23533264
TSC1	Oncogenic Mutations	CNS Cancer	Everolimus	LEVEL_2A	15595939;17304050;16981987;10533067;26540169;24729041;23312829;23158522;21047224;24143074
TSC2	Oncogenic Mutations	CNS Cancer	Everolimus	LEVEL_2A	15595939;17304050;16981987;10533067;26540169;24729041;23312829;23158522;21047224;24143074
AKT1	E17K	Breast Cancer	AZD5363	LEVEL_3A	23394218;26351323;22294718
AKT1	E17K	Ovarian Cancer	AZD5363	LEVEL_3A	23394218;26351323
ALK	L1196M	Non-Small Cell Lung Cancer	Brigatinib	LEVEL_3A	25322323;21502504
ALK	L1196Q	Non-Small Cell Lung Cancer	Brigatinib	LEVEL_3A	25322323;21502504
ARAF	S214C	Non-Small Cell Lung Cancer	Sorafenib	LEVEL_3A	17016424;24569458
ARAF	S214A	Histiocytosis	Sorafenib	LEVEL_3A	17016424;26566875;24569458
BRAF	V600E	Colorectal Cancer	Panitumumab+Vemurafenib	LEVEL_3A	19001320;19884556;20619739;22448344;25589621
BRAF	L597Q	Melanoma	Trametinib	LEVEL_3A	22663011;24933606;22798288
BRAF	L597R	Melanoma	Trametinib	LEVEL_3A	22663011;24933606;22798288
BRAF	L597S	Melanoma	Trametinib	LEVEL_3A	22663011;24933606;22798288
BRAF	L597V	Melanoma	Trametinib	LEVEL_3A	22663011;24933606;22798288
BRAF	K601E	Melanoma	Trametinib	LEVEL_3A	22663011;23248257;24933606;22798288
BRAF	Fusions	Ovarian Cancer	Paclitaxel+Selumetinib	LEVEL_3A	26324360
EGFR	729_761del	Non-Small Cell Lung Cancer	Dacomitinib	LEVEL_3A	18089823;25456362;22753918;24501009;26768165
EGFR	729_761indel	Non-Small Cell Lung Cancer	Dacomitinib	LEVEL_3A	18089823;25456362;22753918;24501009;26768165
EGFR	729_761ins	Non-Small Cell Lung Cancer	Dacomitinib	LEVEL_3A	18089823;25456362;22753918;24501009;26768165
EGFR	L858R	Non-Small Cell Lung Cancer	Dacomitinib	LEVEL_3A	18089823;25456362;22753918;24501009;26768165
ERBB2	Amplification	Breast Cancer	Neratinib	LEVEL_3A	20142587;25287822;23632474;24077916;22967996;19318484
ERBB2	Amplification	Breast Cancer	Trastuzumab+Lapatinib	LEVEL_3A	22257673;19060928;16091755
ERBB2	V659E	Non-Small Cell Lung Cancer	Lapatinib	LEVEL_3A	19791830;23950206
ERBB2	Oncogenic Mutations	Breast Cancer	Neratinib	LEVEL_3A	23220880
ERCC2	Oncogenic Mutations	Bladder Cancer	Cisplatin	LEVEL_3A	25096233;12208738
FGFR1	Amplification	Breast Cancer	Dovitinib	LEVEL_3A	23658459
FGFR1	Amplification	Non-Small Cell Lung Cancer	AZD4547	LEVEL_3A	25465127;23082000
FGFR2	Fusions	Bladder Cancer	JNJ-42756493	LEVEL_3A	26324363;24122810
FGFR2	Fusions	Endometrial Cancer	JNJ-42756493	LEVEL_3A	26324363;24122810
FGFR2	Fusions	Adrenocortical Carcinoma	JNJ-42756493	LEVEL_3A	26324363;24122810
FGFR2	Fusions	Cholangiocarcinoma	BGJ398	LEVEL_3A	27216979
FGFR2	Amplification	Breast Cancer	Dovitinib	LEVEL_3A	23658459
FGFR3	FGFR3-TACC3 Fusion	Bladder Cancer	JNJ-42756493	LEVEL_3A	26324363;22837387
FGFR3	FGFR3-TACC3 Fusion	Glioma	JNJ-42756493	LEVEL_3A	26324363;22837387
FGFR3	FGFR3-TACC3 Fusion	Adrenocortical Carcinoma	JNJ-42756493	LEVEL_3A	26324363;22837387
FLT3	Y572_Y630ins	Leukemia (AML)	Sorafenib	LEVEL_3A	18230792
IDH1	R132C	Leukemia (AML)	AG-120	LEVEL_3A	23393090
IDH1	R132G	Leukemia (AML)	AG-120	LEVEL_3A	23393090
IDH1	R132H	Leukemia (AML)	AG-120	LEVEL_3A	23393090
IDH1	R132Q	Leukemia (AML)	AG-120	LEVEL_3A	23393090
IDH1	R132C	Glioma	AG-120	LEVEL_3A
IDH1	R132G	Glioma	AG-120	LEVEL_3A
IDH1	R132H	Glioma	AG-120	LEVEL_3A
IDH1	R132Q	Glioma	AG-120	LEVEL_3A
IDH1	R132C	Cholangiocarcinoma	AG-120	LEVEL_3A
IDH1	R132G	Cholangiocarcinoma	AG-120	LEVEL_3A
IDH1	R132H	Cholangiocarcinoma	AG-120	LEVEL_3A
IDH1	R132Q	Cholangiocarcinoma	AG-120	LEVEL_3A
IDH1	R132C	Chondrosarcoma	AG-120	LEVEL_3A	23558169
IDH1	R132G	Chondrosarcoma	AG-120	LEVEL_3A	23558169
IDH1	R132H	Chondrosarcoma	AG-120	LEVEL_3A	23558169
IDH1	R132Q	Chondrosarcoma	AG-120	LEVEL_3A	23558169
IDH2	R140Q	All Liquid Tumors	AG-221	LEVEL_3A	23558173
IDH2	R172G	All Liquid Tumors	AG-221	LEVEL_3A	23558173
IDH2	R172K	All Liquid Tumors	AG-221	LEVEL_3A	23558173
IDH2	R172M	All Liquid Tumors	AG-221	LEVEL_3A	23558173
IDH2	R172S	All Liquid Tumors	AG-221	LEVEL_3A	23558173
JAK2	PCM1-JAK2 Fusion	Leukemia	Ruxolitinib	LEVEL_3A	22899477;23630205;23400675;25260694;22875628;25207766;25515960
MAP2K1	Oncogenic Mutations	Melanoma	Selumetinib	LEVEL_3A	23846731;22663011;25351745;26324360;26566875;25370473
MAP2K1	Oncogenic Mutations	Melanoma	Trametinib	LEVEL_3A	23846731;22663011;25351745;26324360;26566875;25370473
MAP2K1	Oncogenic Mutations	Melanoma	Cobimetinib	LEVEL_3A	23846731;22663011;25351745;26324360;26566875;25370473
MAP2K1	Oncogenic Mutations	Non-Small Cell Lung Cancer	Selumetinib	LEVEL_3A	23846731;22663011;25351745;26324360;26566875;25370473
MAP2K1	Oncogenic Mutations	Non-Small Cell Lung Cancer	Trametinib	LEVEL_3A	23846731;22663011;25351745;26324360;26566875;25370473
MAP2K1	Oncogenic Mutations	Non-Small Cell Lung Cancer	Cobimetinib	LEVEL_3A	23846731;22663011;25351745;26324360;26566875;25370473
MAP2K1	Oncogenic Mutations	Low-Grade Serous Ovarian Cancer	Selumetinib	LEVEL_3A	23846731;22663011;25351745;26324360;26566875;25370473
MAP2K1	Oncogenic Mutations	Low-Grade Serous Ovarian Cancer	Trametinib	LEVEL_3A	23846731;22663011;25351745;26324360;26566875;25370473
MAP2K1	Oncogenic Mutations	Low-Grade Serous Ovarian Cancer	Cobimetinib	LEVEL_3A	23846731;22663011;25351745;26324360;26566875;25370473
MAP2K1	Oncogenic Mutations	Histiocytic Disorder	Selumetinib	LEVEL_3A	23846731;22663011;25351745;26324360;26566875;25370473
MAP2K1	Oncogenic Mutations	Histiocytic Disorder	Trametinib	LEVEL_3A	23846731;22663011;25351745;26324360;26566875;25370473
MAP2K1	Oncogenic Mutations	Histiocytic Disorder	Cobimetinib	LEVEL_3A	23846731;22663011;25351745;26324360;26566875;25370473
MET	D1010H	Non-Small Cell Lung Cancer	Crizotinib	LEVEL_3A	27343443;27666659;25898965
MET	D1010Y	Non-Small Cell Lung Cancer	Crizotinib	LEVEL_3A	27343443;27666659;25898965
MET	963_D1010splice	Non-Small Cell Lung Cancer	Capmatinib	LEVEL_3A	21918175;25971938
MET	981_1028splice	Non-Small Cell Lung Cancer	Capmatinib	LEVEL_3A	21918175;25971938
MET	X1006_splice	Non-Small Cell Lung Cancer	Capmatinib	LEVEL_3A	21918175;25971938
MET	X1007_splice	Non-Small Cell Lung Cancer	Capmatinib	LEVEL_3A	21918175;25971938
MET	X1008_splice	Non-Small Cell Lung Cancer	Capmatinib	LEVEL_3A	21918175;25971938
MET	X1009_splice	Non-Small Cell Lung Cancer	Capmatinib	LEVEL_3A	21918175;25971938
MET	X1010_splice	Non-Small Cell Lung Cancer	Capmatinib	LEVEL_3A	21918175;25971938
MET	X963_splice	Non-Small Cell Lung Cancer	Capmatinib	LEVEL_3A	21918175;25971938
MET	963_D1010splice	Non-Small Cell Lung Cancer	Cabozatinib	LEVEL_3A	25971939;25971938
MET	981_1028splice	Non-Small Cell Lung Cancer	Cabozatinib	LEVEL_3A	25971939;25971938
MET	X1006_splice	Non-Small Cell Lung Cancer	Cabozatinib	LEVEL_3A	25971939;25971938
MET	X1007_splice	Non-Small Cell Lung Cancer	Cabozatinib	LEVEL_3A	25971939;25971938
MET	X1008_splice	Non-Small Cell Lung Cancer	Cabozatinib	LEVEL_3A	25971939;25971938
MET	X1009_splice	Non-Small Cell Lung Cancer	Cabozatinib	LEVEL_3A	25971939;25971938
MET	X1010_splice	Non-Small Cell Lung Cancer	Cabozatinib	LEVEL_3A	25971939;25971938
MET	X963_splice	Non-Small Cell Lung Cancer	Cabozatinib	LEVEL_3A	25971939;25971938
MTOR	E2014K	Bladder Cancer	Everolimus	LEVEL_3A	24625776
NRAS	Oncogenic Mutations	Melanoma	Binimetinib	LEVEL_3A	23414587;16273091
NRAS	Oncogenic Mutations	Melanoma	Binimetinib+ribociclib	LEVEL_3A	22983396
NRAS	Oncogenic Mutations	Thyroid Cancer	Selumetinib+Radioiodine Uptake Therapy	LEVEL_3A	23406027;22105174
NTRK1	Fusions	Salivary Gland Cancer	Entrectinib	LEVEL_3A	26565381;26457764;26797418;26884591
NTRK1	Fusions	All Tumors	LOXO-101	LEVEL_3A	26216294;26603524;26884591
NTRK2	Fusions	Salivary Gland Cancer	Entrectinib	LEVEL_3A	26565381;26457764;26797418;26884591
NTRK2	Fusions	Salivary Gland Cancer	LOXO-101	LEVEL_3A	26216294;26603524;26884591
NTRK3	Fusions	Salivary Gland Cancer	Entrectinib	LEVEL_3A	26565381;26457764;26797418;26884591
NTRK3	Fusions	Salivary Gland Cancer	LOXO-101	LEVEL_3A	26216294;26603524;26884591;27093299
PIK3CA	Oncogenic Mutations	Breast Cancer	alpelisib	LEVEL_3A	19366795;27126994
PTCH1	Truncating Mutations	Skin Cancer, Non-Melanoma	Sonidegib	LEVEL_3A	24523439;24900187
PTCH1	Truncating Mutations	Skin Cancer, Non-Melanoma	Vismodegib	LEVEL_3A	22670903;22670904
PTCH1	Truncating Mutations	Embryonal Tumor	Sonidegib	LEVEL_3A	24523439;24900187
RET	Fusions	Non-Small Cell Lung Cancer	Vandetanib	LEVEL_3A	23584301;25366691;23578175;23154560;23991695
ROS1	D2033N	Non-Small Cell Lung Cancer	Cabozantinib	LEVEL_3A	26673800
